# Supplementary material for: Synthesis of Tetrahedranes Containing the Unique Bridging Hetero‐Dipnictogen Ligand EE′ (E ≠ E′=P, As, Sb, Bi)
Source: PubMed Central journal article supplement — Chemistry. 2021 May 14;27(34):8804–10. doi: 10.1002/chem.202100663 (PMC8252408; doi:10.1002/chem.202100663), 2021-05-14
Supplement: CHEM-27-8804-s001.pdf [file CHEM-27-8804-s001.pdf]

# Chemistry–A European Journal

Supporting Information

## Synthesis of Tetrahedranes Containing the Unique Bridging Hetero-Dipnictogen Ligand $EE'$ ( $E \neq E' = P, As, Sb, Bi$ )

Luis Dütsch, Christoph Riesinger, Gábor Balázs, and Manfred Scheer\*

## Contents

|                                                                                                                                                                                                                                                                                                                                                                                                     |    |
|-----------------------------------------------------------------------------------------------------------------------------------------------------------------------------------------------------------------------------------------------------------------------------------------------------------------------------------------------------------------------------------------------------|----|
| General considerations.....                                                                                                                                                                                                                                                                                                                                                                         | 2  |
| Experimental details.....                                                                                                                                                                                                                                                                                                                                                                           | 2  |
| Synthesis of the complexes of the type $[\{\text{CpMo}(\text{CO})_2\}_2(\mu,\eta^2:\eta^2\text{-EE}')] (EE' = \text{PAs (1), PSb (2), AsSb (3a), AsBi (4), SbBi (5)})$ and $[\{\text{CpMo}(\text{CO})_2\}_2(\mu,\eta^2:\eta^2\text{-E}_2)] (E = \text{P ("Mo}_2\text{P}_2"), \text{As ("Mo}_2\text{As}_2"), \text{Sb ("Mo}_2\text{Sb}_2"), \text{Bi ("Mo}_2\text{Bi}_2"))$ – General procedure..... | 2  |
| Synthesis of <b>1</b> using $\text{NaPH}_2$ .....                                                                                                                                                                                                                                                                                                                                                   | 7  |
| Synthesis of the complexes $[\{\text{Cp}'\text{Mo}(\text{CO})_2\}_2(\mu,\eta^2:\eta^2\text{-EE}')] (EE' = \text{AsSb (3b), As}_2\text{ (7), Sb}_2\text{ (8); Cp}' = \eta^5\text{-C}_5\text{H}_4\text{tBu})$ – General procedure.....                                                                                                                                                                | 7  |
| Synthesis of the intermediates $\text{M}[\{\text{CpMo}(\text{CO})_2\}_2\{\mu,\eta^2\text{-E}(\text{SiMe}_3)_2\}]$ ( <b>6a-d</b> ) for X-ray analysis .....                                                                                                                                                                                                                                          | 10 |
| NMR spectra .....                                                                                                                                                                                                                                                                                                                                                                                   | 12 |
| IR Spectra.....                                                                                                                                                                                                                                                                                                                                                                                     | 22 |
| X-ray crystallography.....                                                                                                                                                                                                                                                                                                                                                                          | 23 |
| Details of DFT Calculations .....                                                                                                                                                                                                                                                                                                                                                                   | 32 |
| References.....                                                                                                                                                                                                                                                                                                                                                                                     | 42 |

## General considerations

All manipulations were carried out under an inert atmosphere of dried nitrogen/argon using standard Schlenk and glovebox techniques. The starting materials  $[\text{CpMo}(\text{CO})_2]_2$ ,<sup>[1]</sup>  $[\text{Cp}'\text{Mo}(\text{CO})_2]_2$ ,<sup>[2]</sup>  $\text{LiP}(\text{SiMe}_3)_2$ ,<sup>[3]</sup>  $\text{LiAs}(\text{SiMe}_3)_2$ ,<sup>[4]</sup>  $\text{MSb}(\text{SiMe}_3)_2$  ( $\text{M} = \text{Li}, \text{K}$ ),<sup>[5]</sup>  $\text{KBi}(\text{SiMe}_3)_2$ <sup>[6]</sup> and  $\text{NaPH}_2$ <sup>[7]</sup> were synthesized via the respective literature procedures. The reagents  $\text{PCl}_3$ ,  $\text{AsCl}_3$ ,  $\text{SbCl}_3$ ,  $\text{BiCl}_3$  and the crown-ethers (12-crown-4 and 18-crown-6) are commercially available and were used after purification by distillation or sublimation, respectively. Solvents were freshly distilled under nitrogen after drying over  $\text{CaH}_2$  ( $\text{CH}_2\text{Cl}_2$ ,  $\text{CD}_2\text{Cl}_2$ ), or over K or Na/K alloy (alkanes, THF = tetrahydrofuran). Dried solvents were also taken from a solvent purification system from MBraun. Silica for column chromatography was dried under vacuum at 200 °C for 7 days. NMR spectra were recorded on a Bruker Avance 300 MHz NMR spectrometer ( $^1\text{H}$ : 300.132 MHz,  $^{31}\text{P}$ : 121.495 MHz,  $^{13}\text{C}$ : 75.468 MHz) or a Bruker Avance 400 MHz NMR spectrometer ( $^1\text{H}$ : 400.130 MHz,  $^{31}\text{P}$ : 161.976 MHz,  $^{13}\text{C}$ : 100.613 MHz) with external references of  $\text{SiMe}_4$  ( $^1\text{H}$ ,  $^{13}\text{C}$ ) and  $\text{H}_3\text{PO}_4$  (85%,  $^{31}\text{P}$ ). The chemical shifts  $\delta$  are presented in parts per million (ppm) and coupling constants  $J$  in Hz. The measurements were performed at 300 K. LIFDI-MS and FD-MS spectra were measured on a Jeol AccuTOF GCX by the mass spectrometry department of the University of Regensburg. The respective molecular ion peaks of the desired products **1–8** are assigned as  $[\text{M}^+]$  in each case. IR spectra were recorded either as solids using a ThermoFisher Nicolet iS5 FT-IR spectrometer with an iD7 ATR module and an ITX Germanium or ITX Diamond crystal, or grinded together with dried KBr and pressed to pellets and measured on a VARIAN FTS-800 FR-IR spectrometer. Elemental analyses (EA) were performed by the micro analytical laboratory of the University of Regensburg.

## Experimental details

**Synthesis of the complexes of the type  $[\{\text{CpMo}(\text{CO})_2\}_2(\mu,\eta^2:\eta^2\text{-EE}')]$  ( $\text{EE}' = \text{PAs}$  (**1**),  $\text{PSb}$  (**2**),  $\text{AsSb}$  (**3a**),  $\text{AsBi}$  (**4**),  $\text{SbBi}$  (**5**)) and  $[\{\text{CpMo}(\text{CO})_2\}_2(\mu,\eta^2:\eta^2\text{-E}_2)]$  ( $\text{E} = \text{P}$  (" $\text{Mo}_2\text{P}_2$ "),  $\text{As}$  (" $\text{Mo}_2\text{As}_2$ "),  $\text{Sb}$  (" $\text{Mo}_2\text{Sb}_2$ "),  $\text{Bi}$  (" $\text{Mo}_2\text{Bi}_2$ ") – General procedure**

The synthesis for all complexes of the type  $[\{\text{CpMo}(\text{CO})_2\}_2(\mu,\eta^2:\eta^2\text{-EE}')]$  are similar and, therefore, a general procedure is provided. The data (amount of substances, colour changes, work-up methods and yields) for the specific reactions are given in Table S1.

Dark orange-brown solutions of  $[\text{Cp}(\text{CO})_2\text{Mo}]_2$  (**A**) in 30 mL THF were reacted with  $\text{LiP}(\text{SiMe}_3)_2$  (**E1**),  $\text{LiAs}(\text{SiMe}_3)_2$  (**E2**),  $\text{KSb}(\text{SiMe}_3)_2$  (**E3**) or  $\text{KBi}(\text{SiMe}_3)_2$  (**E4**), respectively, in 10 mL THF leading to colour changes to dark greenish red (**E1**, **E2**), dark greenish brown (**E3**) or dark bronze-coloured (**E4**). These solutions were stirred for 30 minutes. Subsequently,  $\text{E}'\text{Cl}_3$  ( $\text{E}' = \text{P}, \text{As}, \text{Sb}, \text{Bi}$ ) was added, either as pure liquid ( $\text{PCl}_3$  and  $\text{AsCl}_3$ ) or dissolved in 10 mL THF ( $\text{SbCl}_3$  and  $\text{BiCl}_3$ ), and stirred for another 30 minutes. After evaporation of the solvent, the residue was mixed with silica, redissolved in 10 mL  $\text{CH}_2\text{Cl}_2$  and evaporated to dryness. The free-flowing powder was subjected to a column chromatography (silica, 20x4 cm). Elution with a mixture of *n*-hexane and toluene (3:1) leads to a orange red (**1**, **2**), red (**3a**) or dark red (**4**, **5**) fraction containing the desired tetrahedral compounds. For  $\text{Mo}_2\text{P}_2$  and  $\text{Mo}_2\text{As}_2$  sometimes a small yellow fraction can be observed, which

elutes already with pure *n*-hexane or *n*-pentane, containing the respective **MoE<sub>3</sub>** compounds [CpMo(CO)<sub>2</sub>(η<sup>3</sup>-E<sub>3</sub>)]. The solvent of the main fraction was removed *in vacuo* and the residue dried in vacuum for 3 hours. Crystals suitable for single crystal X-ray diffraction analyses could be obtained by cooling saturated CH<sub>2</sub>Cl<sub>2</sub> solutions from room temperature to -30 °C.

**Table S1:** Data for the syntheses of the complexes **Mo<sub>2</sub>P<sub>2</sub>**, **Mo<sub>2</sub>As<sub>2</sub>**, **Mo<sub>2</sub>Sb<sub>2</sub>**, **Mo<sub>2</sub>Bi<sub>2</sub>**, **1**, **2**, **3a**, **4** and **5**.

| Product                             | Amount of A                    | Amount of ME(SiMe <sub>3</sub> ) <sub>2</sub>                                                  | Amount of E'Cl <sub>3</sub>                                | Colour change after 2 <sup>nd</sup> reaction step | Column chromatography | Yield                        |
|-------------------------------------|--------------------------------|------------------------------------------------------------------------------------------------|------------------------------------------------------------|---------------------------------------------------|-----------------------|------------------------------|
| <b>Mo<sub>2</sub>P<sub>2</sub></b>  | 5.60 g<br>12.9 mmol<br>1.0 eq. | <u>LiP(SiMe<sub>3</sub>)<sub>2</sub>(thf)<sub>1.6</sub></u><br>3.80 g<br>12.7 mmol<br>1.0 eq.  | <u>PCl<sub>3</sub></u><br>1.2 mL<br>13.7 mmol<br>1.1 eq.   | dark orange red                                   | orange fraction       | 3.56 g<br>(7.2 mmol = 57 %)  |
| <b>Mo<sub>2</sub>As<sub>2</sub></b> | 4.00 g<br>9.2 mmol<br>1.0 eq.  | <u>LiAs(SiMe<sub>3</sub>)<sub>2</sub>(thf)<sub>1.6</sub></u><br>3.10 g<br>9.0 mmol<br>1.0 eq.  | <u>AsCl<sub>3</sub></u><br>0.8 mL<br>9.5 mmol<br>1.0 eq.   | dark orange red                                   | orange red fraction   | 2,7 g<br>(4.7 mmol = 52 %)   |
| <b>Mo<sub>2</sub>Sb<sub>2</sub></b> | 1.00 g<br>2.3 mmol<br>1.0 eq.  | <u>KSb(SiMe<sub>3</sub>)<sub>2</sub>(thf)<sub>0.4</sub></u><br>724 mg<br>2.15 mmol<br>0.95 eq. | <u>SbCl<sub>3</sub></u><br>525 mg<br>2.3 mmol<br>1.0 eq.   | dark red                                          | red fraction          | 526 mg<br>(0.8 mmol = 37 %)  |
| <b>Mo<sub>2</sub>Bi<sub>2</sub></b> | 2.00 g<br>4.57 mmol<br>1.0 eq. | <u>KBi(SiMe<sub>3</sub>)<sub>2</sub>(thf)<sub>0.3</sub></u><br>1.90 g<br>4.95 mmol<br>1.1 eq.  | <u>BiCl<sub>3</sub></u><br>1.43 g<br>4.57 mmol<br>1.0 eq.  | dark brown                                        | brown fraction        | 965 mg<br>(1.1 mmol = 25 %)  |
| <b>1</b><br>– Method A –            | 556 mg<br>1.28 mmol<br>1.2 eq. | <u>LiP(SiMe<sub>3</sub>)<sub>2</sub>(thf)<sub>1.6</sub></u><br>384 mg<br>1.28 mmol<br>1.2 eq.  | <u>AsCl<sub>3</sub></u><br>0.09 mL<br>1.07 mmol<br>1.0 eq. | dark orange red                                   | orange red fraction   | 400 mg<br>(0.74 mmol = 69 %) |
| <b>1</b><br>– Method B –            | 3.30 g<br>7.6 mmol<br>1.0 eq.  | <u>LiAs(SiMe<sub>3</sub>)<sub>2</sub>(thf)<sub>1.6</sub></u><br>2.55 g<br>7.4 mmol<br>1.0 eq.  | <u>PCl<sub>3</sub></u><br>0.7 mL<br>8.0 mmol<br>1.1 eq.    | dark orange red                                   | orange red fraction   | 1.99 g<br>(3.69 mmol = 50 %) |
| <b>2</b><br>– Method A –            | 1.30 g<br>3.0 mmol<br>1.0 eq.  | <u>LiP(SiMe<sub>3</sub>)<sub>2</sub>(thf)<sub>1.8</sub></u><br>942 mg<br>3.0 mmol<br>1.0 eq.   | <u>SbCl<sub>3</sub></u><br>684 mg<br>3.0 mmol<br>1.0 eq.   | dark orange red                                   | orange red fraction   | 400 mg<br>(0.74 mmol = 69 %) |

| Product                   | Amount of A                                                                                                                                                                                     | Amount of ME(SiMe <sub>3</sub> ) <sub>2</sub>                                                        | Amount of E'Cl <sub>3</sub>                                  | Colour change after 2 <sup>nd</sup> reaction step | Column chromatography | Yield                           |
|---------------------------|-------------------------------------------------------------------------------------------------------------------------------------------------------------------------------------------------|------------------------------------------------------------------------------------------------------|--------------------------------------------------------------|---------------------------------------------------|-----------------------|---------------------------------|
| <b>2</b><br>– Method B –  | 434 mg<br>1.0 mmol<br>1.0 eq.                                                                                                                                                                   | <u>K<b>Sb</b>(SiMe<sub>3</sub>)<sub>2</sub>(thf)<sub>1.8</sub></u><br>437 mg<br>1.0 mmol<br>1.0 eq.  | <u>P</u> Cl <sub>3</sub><br>87 μL<br>1.0 mmol<br>1.0 eq.     | dark orange red                                   | orange red fraction   | 105 mg<br>(0.18 mmol<br>= 18 %) |
| <b>3a</b><br>– Method A – | 434 mg<br>1.0 mmol<br>1.0 eq.                                                                                                                                                                   | <u>Li<b>As</b>(SiMe<sub>3</sub>)<sub>2</sub>(thf)<sub>1.8</sub></u><br>358 mg<br>1.0 mmol<br>1.0 eq. | <u>Sb</u> Cl <sub>3</sub><br>181 mg<br>1.0 mmol<br>1.0 eq.   | dark red                                          | red fraction          | 298 mg<br>(0.51 mmol<br>= 51 %) |
| <b>3a</b><br>– Method B – | 152 mg<br>0.35 mmol<br>1.0 eq.                                                                                                                                                                  | <u>K<b>Sb</b>(SiMe<sub>3</sub>)<sub>2</sub></u><br>107 mg<br>0.35 mmol<br>1.0 eq.                    | <u>As</u> Cl <sub>3</sub><br>0.03 mL<br>0.35 mmol<br>1.0 eq. | dark red                                          | red fraction          | 136 mg<br>(0.22 mmol<br>= 63 %) |
| <b>4</b><br>– Method A –  | 174 mg<br>0.4 mmol<br>1.0 eq.                                                                                                                                                                   | <u>Li<b>As</b>(SiMe<sub>3</sub>)<sub>2</sub>(thf)<sub>1.8</sub></u><br>143 mg<br>0.4 mmol<br>1.0 eq. | <u>Bi</u> Cl <sub>3</sub><br>126 mg<br>0.4 mmol<br>1.0 eq.   | dark red                                          | dark red              | 166 mg<br>(0.23 mmol<br>= 58 %) |
| <b>4</b><br>– Method B –  | <b>A + K<b>Bi</b>(SiMe<sub>3</sub>)<sub>2</sub>(thf)<sub>0.3</sub> + <b>As</b>Cl<sub>3</sub> unsuccessful (only traces of <b>Mo<sub>2</sub>As<sub>2</sub></b> and <b>MoAs<sub>3</sub></b>)!</b> |                                                                                                      |                                                              |                                                   |                       |                                 |
| <b>5</b><br>– Method A –  | 217 mg<br>0.50 mmol<br>1.0 eq.                                                                                                                                                                  | <u>K<b>Sb</b>(SiMe<sub>3</sub>)<sub>2</sub>(thf)<sub>0.4</sub></u><br>168 mg<br>0.50 mmol<br>1.0 eq. | <u>Bi</u> Cl <sub>3</sub><br>173 mg<br>0.55 mmol<br>1.1 eq.  | dark red<br>brown                                 | dark red<br>fraction  | 136 mg<br>(0.22 mmol<br>= 63 %) |
| <b>5</b><br>– Method B –  | <b>A + K<b>Bi</b>(SiMe<sub>3</sub>)<sub>2</sub>(thf)<sub>0.3</sub> + <b>Sb</b>Cl<sub>3</sub> unsuccessful!</b>                                                                                  |                                                                                                      |                                                              |                                                   |                       |                                 |
| <b>Mo<sub>2</sub>PBi</b>  | <b>A + Li<b>P</b>(SiMe<sub>3</sub>)<sub>2</sub>(thf)<sub>1.6</sub> + <b>Bi</b>Cl<sub>3</sub> unsuccessful!</b>                                                                                  |                                                                                                      |                                                              |                                                   |                       |                                 |
|                           | <b>A + K<b>Bi</b>(SiMe<sub>3</sub>)<sub>2</sub>(thf)<sub>0.3</sub> + <b>PCl<sub>3</sub></b> unsuccessful!</b>                                                                                   |                                                                                                      |                                                              |                                                   |                       |                                 |

## Analytical Data:

### **Mo<sub>2</sub>P<sub>2</sub>**:<sup>[8]</sup>

<sup>1</sup>H NMR (CD<sub>2</sub>Cl<sub>2</sub>):  $\delta$ /ppm = 5.20 (s, Cp)

<sup>31</sup>P NMR (CD<sub>2</sub>Cl<sub>2</sub>):  $\delta$ /ppm = -43.7 (s, P<sub>2</sub>), -351.9 (traces, [CpMo(CO)<sub>2</sub>( $\eta^3$ -P<sub>3</sub>)])

### **Mo<sub>2</sub>As<sub>2</sub>**:<sup>[9]</sup>

<sup>1</sup>H NMR (acetone-d<sub>6</sub>):  $\delta$ /ppm = 5.36 (s, Cp)

### **Mo<sub>2</sub>Sb<sub>2</sub>**:<sup>[10]</sup>

EA: calcd. (%) for [C<sub>14</sub>H<sub>10</sub>Mo<sub>2</sub>O<sub>4</sub>Sb<sub>2</sub>]: C: 24.81, H: 1.49

found (%): C: 24.92, H: 1.47

FD-MS (THF): Cation *m/z* (%): 677.57 (100) [**M**<sup>+</sup>]

### **Mo<sub>2</sub>Bi<sub>2</sub>**:<sup>[11]</sup>

FD-MS (toluene): Cation *m/z* (%): 851.79 (100) [**M**<sup>+</sup>]

### **Mo<sub>2</sub>PAs (1)**:<sup>[12]</sup>

<sup>1</sup>H NMR (CD<sub>2</sub>Cl<sub>2</sub>):  $\delta$ /ppm = 5.20 (s, Cp)

<sup>1</sup>H NMR (C<sub>6</sub>D<sub>6</sub>):  $\delta$ /ppm = 4.51 (s, Cp)

<sup>31</sup>P NMR (C<sub>6</sub>D<sub>6</sub>/CD<sub>2</sub>Cl<sub>2</sub>):  $\delta$ /ppm = 30.2 (s, **1**),

<sup>31</sup>P NMR (C<sub>6</sub>D<sub>6</sub>):  $\delta$ /ppm = 34.5 (s, **1**), -44.5 (traces, **Mo<sub>2</sub>P<sub>2</sub>**)

<sup>31</sup>P NMR (CD<sub>2</sub>Cl<sub>2</sub>):  $\delta$ /ppm = 30.1 (s, **1**), -43.2 (traces < 5 %, **Mo<sub>2</sub>P<sub>2</sub>**)

<sup>13</sup>C{<sup>1</sup>H} NMR (CD<sub>2</sub>Cl<sub>2</sub>):  $\delta$ /ppm = 85.87 (s, Cp), 226.37 (s, CO), 226.85 (s, CO)

ESI-MS (MeCN/H<sub>2</sub>O): Cation *m/z* (%) = 485.8 (33) [**M**<sup>+</sup>-2·CO], 457.8 (100) [**M**<sup>+</sup>-3·CO], 429.8 (55) [**M**<sup>+</sup>-4·CO]

EA: calcd. (%) for [C<sub>14</sub>H<sub>10</sub>Mo<sub>2</sub>O<sub>4</sub>PAs]: C: 30.90, H: 1.85

found (%): C: 30.80, H: 1.95

IR (KBr):  $\tilde{\nu}$ /cm<sup>-1</sup> = 2058 (w), 1946 (vs), 1900 (vs), 1420 (w), 1060 (vw), 1007 (w), 819 (m), 567 (m), 531 (m), 498 (m), 456 (m)

**Mo<sub>2</sub>PSb (2):**<sup>[12]</sup>

|                                                         |                                                                                                        |
|---------------------------------------------------------|--------------------------------------------------------------------------------------------------------|
| <sup>1</sup> H NMR (CD <sub>2</sub> Cl <sub>2</sub> ):  | δ/ppm = 5.18 (s, Cp), 5.23 (traces, Cp of <b>Mo<sub>2</sub>P<sub>2</sub></b> )                         |
| <sup>1</sup> H NMR (CDCl <sub>3</sub> ):                | δ/ppm = 5.15 (s, Cp), 5.21 (traces, Cp of <b>Mo<sub>2</sub>P<sub>2</sub></b> )                         |
| <sup>1</sup> H NMR (C <sub>6</sub> D <sub>6</sub> ):    | δ/ppm = 4.48 (s, Cp), 4.54 (traces, Cp of <b>Mo<sub>2</sub>P<sub>2</sub></b> )                         |
| <sup>31</sup> P NMR (CD <sub>2</sub> Cl <sub>2</sub> ): | δ/ppm = 90.7 (s, <b>1</b> ), -43.1 (traces < 5 %, <b>Mo<sub>2</sub>P<sub>2</sub></b> )                 |
| <sup>31</sup> P NMR (CDCl <sub>3</sub> ):               | δ/ppm = 90.9 (s, <b>1</b> ), -47.0 (traces < 3 %, <b>Mo<sub>2</sub>P<sub>2</sub></b> )                 |
| <sup>31</sup> P NMR (C <sub>6</sub> D <sub>6</sub> ):   | δ/ppm = 98.8 (s, <b>1</b> ), -44.4 (traces < 5 %, <b>Mo<sub>2</sub>P<sub>2</sub></b> )                 |
| EA:                                                     | calcd. (%) for [C <sub>14</sub> H <sub>10</sub> Mo <sub>2</sub> O <sub>4</sub> PSb]: C: 28.63, H: 1.72 |
|                                                         | found (%): C: 29.20, H: 1.80                                                                           |
| FD-MS (toluene):                                        | Cation <i>m/z</i> (%): 585.75 (100) [ <b>M</b> <sup>+</sup> ]                                          |

**"Mo<sub>2</sub>PBi":**

|                                                                          |                                                                                                                                                                                |
|--------------------------------------------------------------------------|--------------------------------------------------------------------------------------------------------------------------------------------------------------------------------|
| FD-MS (toluene):                                                         | Cation <i>m/z</i> (%): 495.77 (100) [ <b>Mo<sub>2</sub>P<sub>2</sub></b> ], 467.82 (68) [ <b>Mo<sub>2</sub>P<sub>2</sub>-CO</b> ], several unidentified decomposition products |
| <sup>31</sup> P{ <sup>1</sup> H} NMR (CD <sub>2</sub> Cl <sub>2</sub> ): | δ/ppm = -43.3 ( <b>Mo<sub>2</sub>P<sub>2</sub></b> )                                                                                                                           |

**Mo<sub>2</sub>AsSb (3a):**

|                                                            |                                                                                                                                                                        |
|------------------------------------------------------------|------------------------------------------------------------------------------------------------------------------------------------------------------------------------|
| <sup>1</sup> H NMR (CDCl <sub>3</sub> ):                   | δ/ppm = 5.11 (s, Cp), 5.14/5.30 (traces, Cp of <b>Mo<sub>2</sub>As<sub>2</sub>/Mo<sub>2</sub>Sb<sub>2</sub></b> )                                                      |
| <sup>13</sup> C{ <sup>1</sup> H} NMR (CDCl <sub>3</sub> ): | δ/ppm = 83.51 (s, Cp), 226.33 (s, CO), 226.93 (s, CO)                                                                                                                  |
| EA:                                                        | calcd. (%) for [C <sub>14</sub> H <sub>10</sub> Mo <sub>2</sub> O <sub>4</sub> AsSb]·(toluene) <sub>0.06</sub> : C: 27.22, H: 1.66                                     |
|                                                            | found (%): C: 27.34, H: 1.62                                                                                                                                           |
| FD-MS (toluene):                                           | Cation <i>m/z</i> (%): 629.70 (100) [ <b>M</b> <sup>+</sup> ], 677.67 (3) [ <b>Mo<sub>2</sub>Sb<sub>2</sub></b> ], 583.71 (14) [ <b>Mo<sub>2</sub>As<sub>2</sub></b> ] |

**Mo<sub>2</sub>AsBi (4):**

|                                                                          |                                                                                                                                    |
|--------------------------------------------------------------------------|------------------------------------------------------------------------------------------------------------------------------------|
| <sup>1</sup> H NMR (CD <sub>2</sub> Cl <sub>2</sub> ):                   | δ/ppm = 5.13 (s, Cp)                                                                                                               |
| <sup>13</sup> C{ <sup>1</sup> H} NMR (CD <sub>2</sub> Cl <sub>2</sub> ): | δ/ppm = 83.08 (s, Cp), 84.53 (s, traces, Cp of <b>Mo<sub>2</sub>As<sub>2</sub></b> ), 225.35 (s, CO), 226.49 (s, CO)               |
| EA:                                                                      | calcd. (%) for [C <sub>14</sub> H <sub>10</sub> Mo <sub>2</sub> O <sub>4</sub> AsBi]·(toluene) <sub>0.05</sub> : C: 23.85, H: 1.45 |

|                  |                   |                                                                              |
|------------------|-------------------|------------------------------------------------------------------------------|
|                  | found (%):        | C: 23.95, H: 1.30                                                            |
| FD-MS (toluene): | Cation $m/z$ (%): | 717.74 (100) [ $\mathbf{M}^+$ ], 583.65 (5) [ $\mathbf{Mo}_2\mathbf{As}_2$ ] |

#### **Mo<sub>2</sub>SbBi (5):**

<sup>1</sup>H NMR (CD<sub>2</sub>Cl<sub>2</sub>):  $\delta$ /ppm = 5.07 (traces, s, Cp of **Mo<sub>2</sub>Bi<sub>2</sub>**) 5.09 (s, Cp), 5.10 (traces, s, Cp of **Mo<sub>2</sub>Sb<sub>2</sub>**)

<sup>13</sup>C{<sup>1</sup>H} NMR (CD<sub>2</sub>Cl<sub>2</sub>):  $\delta$ /ppm = 81.49 (s, traces, Cp of **Mo<sub>2</sub>Bi<sub>2</sub>**), 81.93 (s, Cp), 82.50 (s, traces, Cp of **Mo<sub>2</sub>Sb<sub>2</sub>**), 226.31 (s, CO), 226.92 (s, CO)

EA: calcd. (%) for [C<sub>14</sub>H<sub>10</sub>Mo<sub>2</sub>O<sub>4</sub>SbBi]·(toluene)<sub>0.15</sub>: C: 23.21, H: 1.45

found (%): C: 23.26, H: 1.30

FD-MS (toluene): Cation  $m/z$  (%): 763.65 (100) [ $\mathbf{M}^+$ ], 677.57 (31) [**Mo<sub>2</sub>Sb<sub>2</sub>**]

#### **Synthesis of 1 using NaPH<sub>2</sub>**

A dark orange-brown solution of [Cp(CO)<sub>2</sub>Mo]<sub>2</sub> (**A**; 2.0 g, 4.61 mmol, 1 eq.) in 30 mL THF was reacted with NaPH<sub>2</sub> (280 mg, 5.00 mmol, 1 eq.) in 50 mL THF leading to a colour change to dark purple. The solution was stirred for 30 minutes. Subsequently, AsCl<sub>3</sub> (0.45 mL, 4.60 mmol, 1 eq.) was added as a pure liquid. The resulting orange suspension was stirred for another 15 hours. After evaporation of the solvent, the residue was mixed with silica, redissolved in 10 mL CH<sub>2</sub>Cl<sub>2</sub> and evaporated to dryness. The free-flowing powder was subjected to a column chromatography (silica, 30 x 3.5 cm). Elution with a mixture of *n*-hexane and CH<sub>2</sub>Cl<sub>2</sub> (1:1) leads to an orange red fraction containing **1**. An additional orange fraction could be observed, which could not be further characterised. The solvent was removed and the residue dried in vacuum for 3 hours.

**Yield** 398 mg (0.75 mmol, 16.4 %)

<sup>31</sup>P NMR (C<sub>6</sub>D<sub>6</sub>)  $\delta$ /ppm = 33.7 (traces of [{CpMo(CO)<sub>2</sub>]<sub>2</sub>( $\mu$ -H)( $\mu$ -PH<sub>2</sub>)}), 34.7 (s, **1**)

#### **Synthesis of the complexes [{Cp'Mo(CO)<sub>2</sub>]<sub>2</sub>( $\mu$ , $\eta^2$ : $\eta^2$ -EE')] (EE' = AsSb (**3b**), As<sub>2</sub> (**7**), Sb<sub>2</sub> (**8**); Cp' = $\eta^5$ -C<sub>5</sub>H<sub>4</sub><sup>t</sup>Bu) – General procedure**

The synthesis for the complexes **3b**, **7** and **8** are similar and, therefore, a general procedure is provided. The data (amount of substances, colour changes, work-up method and yield) for the specific reactions are given in Table S2.

Dark orange-brown solutions of [Cp'(CO)<sub>2</sub>Mo]<sub>2</sub> in 30 mL THF were reacted with LiAs(SiMe<sub>3</sub>)<sub>2</sub> (**E2**) or LiSb(SiMe<sub>3</sub>)<sub>2</sub> (**E3**), respectively, in 10 mL THF leading to colour changes to dark greenish red (**E2**) or dark greenish brown (**E3**). These solutions were stirred for 30 minutes. Subsequently, E'Cl<sub>3</sub> (E' = As, Sb) was added, either as pure liquid (AsCl<sub>3</sub>) or dissolved in 10 mL THF (SbCl<sub>3</sub>), and stirred for another 30 minutes. After



evaporation of the solvent, the residue was mixed with silica, redissolved in 10 mL CH<sub>2</sub>Cl<sub>2</sub> and evaporated to dryness. The free-flowing powder was subjected to a column chromatography (silica, 20x4 cm). Elution with a mixture of *n*-hexane and toluene (5:1) leads to a fraction containing the desired tetrahedral compounds. In the case of **7** a yellow first fraction can be observed, which eluates already with pure *n*-pentane, containing the respective **MoE<sub>3</sub>** compound [Cp'<sup>1</sup>Mo(CO)<sub>2</sub>(η<sup>3</sup>-As<sub>3</sub>)]. The solvent was removed *in vacuo* and the residue dried in vacuum for 3 hours. Crystals suitable for single crystal X-ray diffraction analyses could be obtained by cooling saturated CH<sub>2</sub>Cl<sub>2</sub> solutions from room temperature to -30 °C.

**Table S2:** Data for the syntheses of the complexes **3b**, **7** and **8**; dme = dimethoxyethane.

| Product   | Amount of [Cp' <sup>1</sup> (CO) <sub>2</sub> Mo] <sub>2</sub> | Amount of ME(SiMe <sub>3</sub> ) <sub>2</sub>                                                   | Amount of E' <sup>1</sup> Cl <sub>3</sub>                   | Colour change after 2 <sup>nd</sup> reaction step | Column chromatography | Yield                        |
|-----------|----------------------------------------------------------------|-------------------------------------------------------------------------------------------------|-------------------------------------------------------------|---------------------------------------------------|-----------------------|------------------------------|
| <b>3b</b> | 500 mg<br>0.9 mmol<br>1.0 eq.                                  | <u>LiAs(SiMe<sub>3</sub>)<sub>2</sub>(thf)<sub>2,3</sub></u><br>355 mg<br>0.9 mmol<br>1.0 eq.   | <u>SbCl<sub>3</sub></u><br>204 mg<br>0.9 mmol<br>1.0 eq.    | dark orange red                                   | dark red fraction     | 325 mg<br>(0.44 mmol = 49 %) |
| <b>7</b>  | 2.00 g<br>3.66 mmol<br>1.0 eq.                                 | <u>LiAs(SiMe<sub>3</sub>)<sub>2</sub>(thf)<sub>2,0</sub></u><br>1.44 g<br>3.84 mmol<br>1.05 eq. | <u>AsCl<sub>3</sub></u><br>0.32 mL<br>3.84 mmol<br>1.05 eq. | dark orange red                                   | dark red fraction     | 1.40 g<br>(2.01 mmol = 55 %) |
| <b>8</b>  | 500 mg<br>0.9 mmol<br>1.0 eq.                                  | <u>LiSb(SiMe<sub>3</sub>)<sub>2</sub>(dme)</u><br>328 mg<br>0.9 mmol<br>1.0 eq.                 | <u>SbCl<sub>3</sub></u><br>226 mg<br>1.0 mmol<br>1.1 eq.    | dark orange red                                   | dark red fraction     | 208 mg<br>(0.26 mmol = 29 %) |

### Analytical Data:

#### (Cp'<sup>1</sup>)Mo<sub>2</sub>AsSb (**3b**):

<sup>1</sup>H NMR (CD<sub>2</sub>Cl<sub>2</sub>): δ/ppm = 1.27 (s, tBu, 18H), 5.00 (m, Cp, 2H), 5.06 (m, Cp, 4H), 5.15 (m, Cp, 2H)

<sup>13</sup>C{<sup>1</sup>H} NMR (CD<sub>2</sub>Cl<sub>2</sub>): δ/ppm = 31.77 (s, tBu (quart.)), 32.03 (s, tBu (Me)), 81.63 (s, Cp (C-H)), 82.74 (s, Cp (C-H)), 83.11 (s, Cp (C-H)), 83.90 (s, Cp (C-H)), 118.26 (s, Cp (quart.)), 228.03 (s, CO), 228.51 (s, CO)

EA: calcd. (%) for [C<sub>22</sub>H<sub>26</sub>Mo<sub>2</sub>O<sub>4</sub>AsSb]: C: 35.56, H: 3.53  
found (%): C: 35.70, H: 3.41

FD-MS (toluene): Cation *m/z* (%): 741.79 (100) [M<sup>+</sup>], 695.81 (9) [Cp'<sub>2</sub>(CO)<sub>4</sub>Mo<sub>2</sub>As<sub>2</sub>]

**(Cp')Mo<sub>2</sub>As<sub>2</sub> (7):**

<sup>1</sup>H NMR (C<sub>6</sub>D<sub>6</sub>): δ/ppm = 1.06 (s, tBu, 18H), 4.61 (t, 2.4 Hz, Cp, 4H), 4.75 (t, 2.4 Hz, Cp, 4H)

<sup>13</sup>C{<sup>1</sup>H} NMR (C<sub>6</sub>D<sub>6</sub>): δ/ppm = 31.3 (s, tBu (quart.)), 31.8 (s, tBu (Me)), 83.0 (s, Cp (C-H)), 84.8 (s, Cp (C-H)), 119.0 (s, Cp (quart.)), 228.5 (s, CO)

EA: calcd. (%) for [C<sub>22</sub>H<sub>26</sub>As<sub>2</sub>Mo<sub>2</sub>O<sub>4</sub>]: C: 37.96, H: 3.76  
found (%): C: 37.42, H: 3.5

FD-MS (CH<sub>2</sub>Cl<sub>2</sub>): Cation *m/z* (%): 695.86 (100) [M<sup>+</sup>]; 789.72 (58) [Cp'<sub>2</sub>Mo<sub>2</sub>As<sub>4</sub>(CO)<sub>2</sub>]

IR (ATR):  $\tilde{\nu}/\text{cm}^{-1}$  = 3098 (w), 2955 (m), 2864 (w), 1965 (vs), 1934 (vs), 1893 (vs), 1872 (vs), 1478 (m), 1461 (m), 1444 (w), 1398 (w), 1360 (m), 1269 (m), 1197 (w), 1148 (m), 1060 (w), 1040 (w), 1019 (w), 921 (w), 906 (w), 880 (w), 842 (m), 830 (m), 815 (s), 801 (s), 673 (w)

**(Cp')Mo<sub>2</sub>Sb<sub>2</sub> (8):**

<sup>1</sup>H NMR (C<sub>6</sub>D<sub>6</sub>): δ/ppm = 1.08 (s, tBu, 9H), 4.43 (t, 2.4 Hz, Cp, 2H), 4.75 (t, 2.4 Hz, Cp, 2H)

<sup>13</sup>C{<sup>1</sup>H} NMR (C<sub>6</sub>D<sub>6</sub>): δ/ppm = 31.4 (s, tBu (quart.)), 31.9 (s, tBu (Me)), 81.1 (s, Cp (C-H)), 81.4 (s, Cp (C-H)), 116.8 (s, Cp (quart.)), 228.7 (s, CO)

EA: calcd. (%) for [(C<sub>9</sub>H<sub>13</sub>)(CO)<sub>2</sub>Mo]<sub>2</sub>Sb<sub>2</sub>: C: 33.45, H: 3.32  
found (%): C: 33.61, H: 3.34

LIFDI-MS (toluene): Cation *m/z* (%): 789.78 (100) [M<sup>+</sup>]

IR (ATR):  $\tilde{\nu}/\text{cm}^{-1}$  = 2983 (w), 2965 (w), 2943 (w), 2902 (w), 1918 (vs), 1890 (vs), 1866 (vs), 1842 (w), 1476 (w), 1462 (w), 1443 (w), 1400 (w), 1362 (w), 1269 (w), 1147 (w), 1058 (w), 1041 (w), 1020 (w), 904 (w), 883 (w), 842 (w), 831 (w), 818 (w), 804 (w), 682 (w)

### Synthesis of the intermediates $M\{[CpMo(CO)_2]_2\{\mu,\eta^2-E(SiMe_3)_2\}\}$ (**6a-d**) for X-ray analysis

The syntheses of crystalline sample of the salts **6a-d** are similar and, therefore, a general procedure is provided. The amount of substances, which are used in the specific reactions are given in Table S3.

Dark orange-brown solutions of  $[Cp(CO)_2Mo]_2$  (**A**) in 5 mL THF were reacted with  $LiP(SiMe_3)_2$  (**E1**),  $LiAs(SiMe_3)_2$  (**E2**),  $KSb(SiMe_3)_2$  (**E3**) or  $KBi(SiMe_3)_2$  (**E4**), respectively, in 5 mL THF leading to colour changes to dark greenish red (**E1, E2**), dark greenish brown (**E3**) or dark bronze-coloured (**E4**). To this solution the respective crown-ether was added, either as a stock solution in DME (12-crown-4 for Li) or as a solid dissolved in 5 mL THF (18-crown-6 for K). After stirring for 30 minutes the solution was layered with *n*-hexane and stored at -30 °C under exclusion from light. After several days the products **6a-c** can be obtained as crystals suitable for single crystal X-ray diffraction. Crystallisation of **6d**, however, was unsuccessful, maybe due to low stability of **6d**.

For NMR characterization of **6a** compound **A** (84 mg, 0.2 mmol) and  $LiP(SiMe_3)_2(thf)_{1.6}$  (65 mg, 0.2 mmol) are both solved in 15 mL toluene and the solutions were combined. After few minutes, **6a** precipitates and the slightly orange coloured mother liquid was decanted off. The residue was dried for 10 minutes and subjected to  $^1H$ ,  $^{31}P$  and  $^{31}P\{^1H\}$  NMR spectroscopy without further purification (Figure S15-S17).

**Table S3:** Data for the syntheses of the complexes **6a-d** for X-ray analysis.

| Product   | Amount of <b>A</b>           | Amount of $ME(SiMe_3)_2$                                                      | Amount of crown-ether                                                                  |
|-----------|------------------------------|-------------------------------------------------------------------------------|----------------------------------------------------------------------------------------|
| <b>6a</b> | 87 mg<br>0.2 mmol<br>1.0 eq. | <u><math>LiP(SiMe_3)_2(thf)_{2.3}</math></u><br>65 mg<br>0.2 mmol<br>1.0 eq.  | <u><b>12-crown-4</b></u><br>0.25 mL of a 0.81 M solution in DME<br>0.2 mmol<br>1.0 eq. |
| <b>6b</b> | 87 mg<br>0.2 mmol<br>1.0 eq. | <u><math>LiAs(SiMe_3)_2(thf)_{1.6}</math></u><br>69 mg<br>0.2 mmol<br>1.0 eq. | <u><b>12-crown-4</b></u><br>0.25 mL of a 0.81 M solution in DME<br>0.2 mmol<br>1.0 eq. |
| <b>6c</b> | 87 mg<br>0.2 mmol<br>1.0 eq. | <u><math>KSb(SiMe_3)_2</math></u><br>61 mg<br>0.2 mmol<br>1.0 eq.             | <u><b>18-crown-6</b></u><br>58 mg<br>0.2 mmol<br>1.0 eq.                               |
| <b>6d</b> | 87 mg<br>0.2 mmol<br>1.0 eq. | <u><math>KBi(SiMe_3)_2(thf)_{0.3}</math></u><br>83 mg<br>0.2 mmol<br>1.0 eq.  | <u><b>18-crown-6</b></u><br>58 mg<br>0.2 mmol<br>1.0 eq.                               |

## Analytical Data:

- 6a:**  $^1\text{H}$  NMR ( $\text{CD}_2\text{Cl}_2$ ):  $\delta/\text{ppm} = 0.28$  (s, 9H,  $\text{SiMe}_3$ ),  $0.30$  (s, 9H,  $\text{SiMe}_3$ ),  $1.79/3.66$  (t, 16H, two THFs coordinating the lithium cation),  $5.22$  (s, 10H, Cp)
- $^1\text{H}$  NMR ( $\text{CD}_3\text{CN}$ ):  $\delta/\text{ppm} = 0.18$  (s, 9H,  $\text{SiMe}_3$ ),  $0.20$  (s, 9H,  $\text{SiMe}_3$ ),  $1.80/3.64$  (t, 4H, half THF coordinating the lithium cation),  $4.95$  (s, 10H, Cp)
- $^{31}\text{P}\{^1\text{H}\}$  NMR ( $\text{CD}_2\text{Cl}_2$ ):  $\delta/\text{ppm} = 4.0$  (s,  $\text{P}(\text{SiMe}_3)_2$ ), the signal is broadening in the proton coupled  $^{31}\text{P}$  NMR spectrum upon coupling to the methyl groups of  $\text{SiMe}_3$
- $^{31}\text{P}\{^1\text{H}\}$  NMR ( $\text{CD}_3\text{CN}$ ):  $\delta/\text{ppm} = 11.4$  (s,  $\text{P}(\text{SiMe}_3)_2$ )
- $^{31}\text{P}$  NMR ( $\text{CD}_3\text{CN}$ ):  $\delta/\text{ppm} = 11.4$  (s,  $\text{P}(\text{SiMe}_3)_2$ )
- $^{13}\text{C}\{^1\text{H}\}$  NMR ( $\text{CD}_3\text{CN}$ ):  $\delta/\text{ppm} = 4.07$  (s,  $\text{SiMe}_3$ ),  $4.15$  (s,  $\text{SiMe}_3$ ),  $25.83$  (s, THF),  $67.88$  (s, THF),  $89.54$  (s, Cp); the signals of the CO ligands were too weak and could not be observed

## NMR spectra

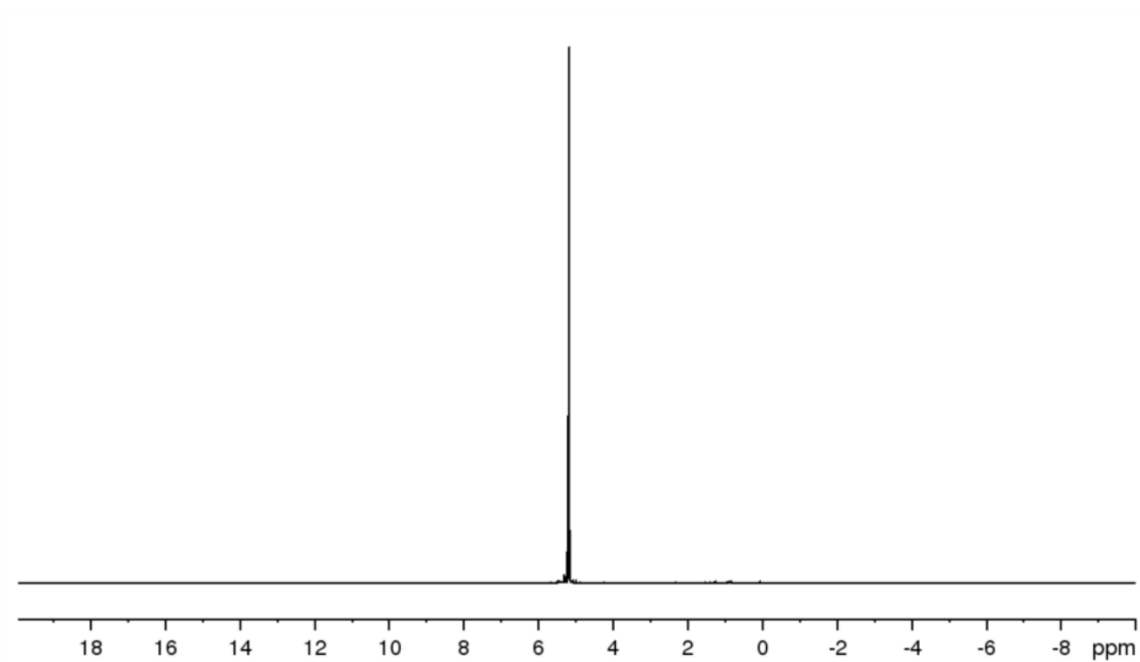

**Figure S1:**  $^1\text{H}$  NMR spectrum of  $[(\text{CpMo}(\text{CO})_2)_2(\mu,\eta^2:\eta^2\text{-PAs})]$  (**1**) in  $\text{CD}_2\text{Cl}_2$ .

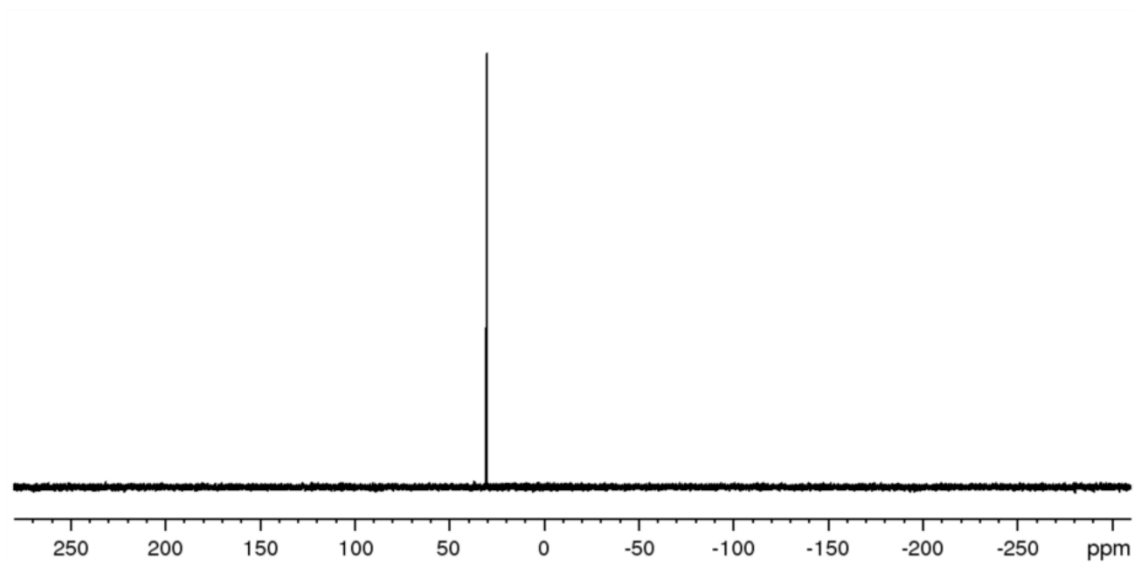

**Figure S2:**  $^{31}\text{P}$  NMR spectrum of  $[(\text{CpMo}(\text{CO})_2)_2(\mu,\eta^2:\eta^2\text{-PAs})]$  (**1**) in  $\text{C}_6\text{D}_6$ .

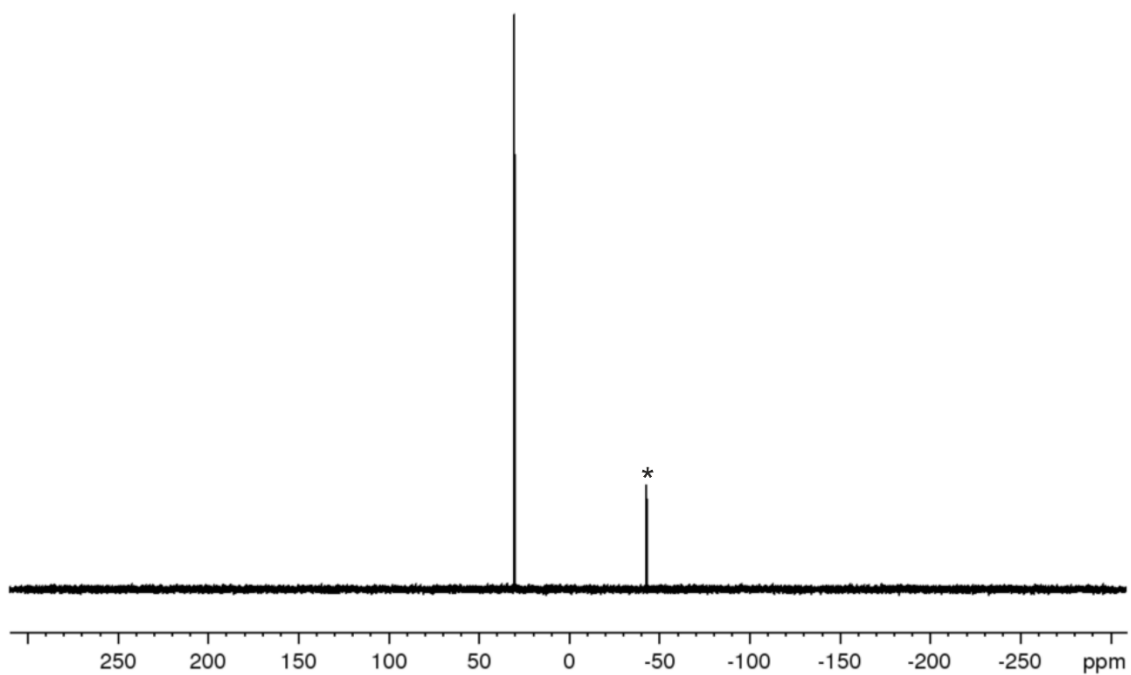

Figure S3:  $^{31}\text{P}$  NMR spectrum of  $[(\text{CpMo}(\text{CO})_2)_2(\mu,\eta^2:\eta^2\text{-PAs})]$  (**1**) in  $\text{CD}_2\text{Cl}_2$  with additional formed traces of  $\text{Mo}_2\text{P}_2$  (\*; < 5%).

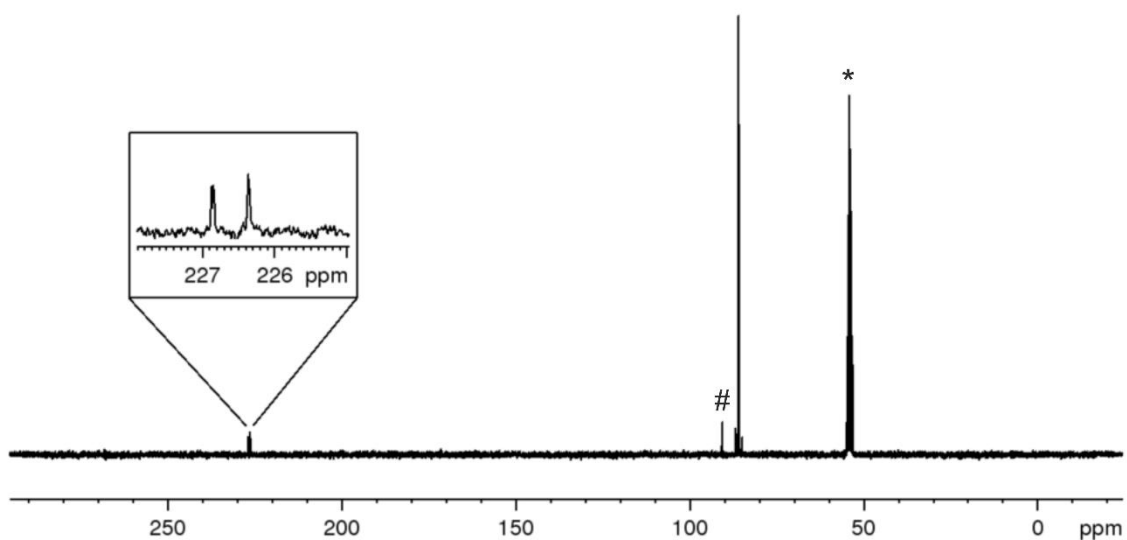

Figure S4:  $^{13}\text{C}\{^1\text{H}\}$  NMR spectrum of  $[(\text{CpMo}(\text{CO})_2)_2(\mu,\eta^2:\eta^2\text{-PAs})]$  (**1**) in  $\text{CD}_2\text{Cl}_2$ ; \* =  $\text{CD}_2\text{Cl}_2$ , # = Cp of traces of  $\text{Mo}_2\text{P}_2$ .

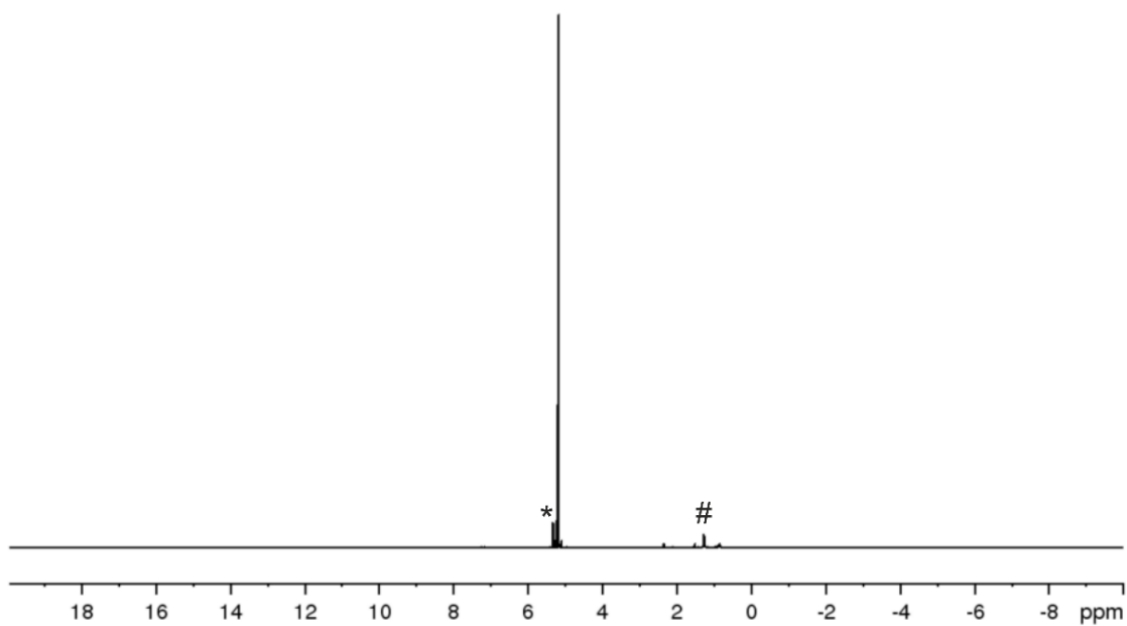

Figure S5:  $^1\text{H}$  NMR spectrum of  $[(\text{CpMo}(\text{CO})_2)_2(\mu,\eta^2:\eta^2\text{-PSb})]$  (**2**) in  $\text{CD}_2\text{Cl}_2$ ; \* =  $\text{CD}_2\text{Cl}_2$ , # = H grease.

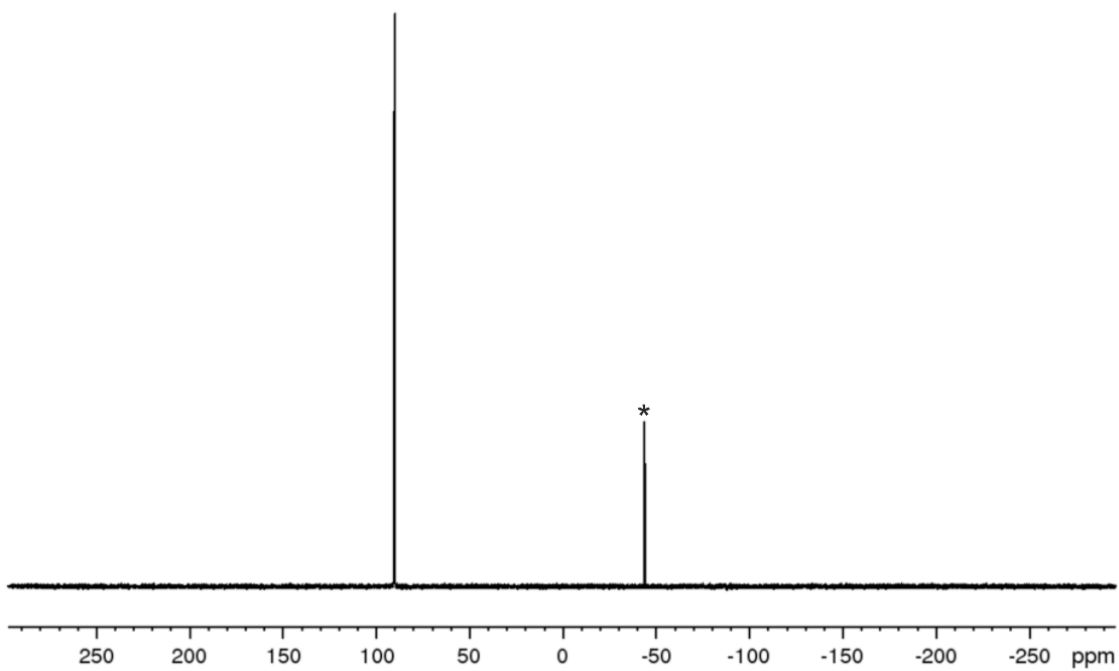

Figure S6:  $^{31}\text{P}$  NMR spectrum of  $[(\text{CpMo}(\text{CO})_2)_2(\mu,\eta^2:\eta^2\text{-PSb})]$  (**2**) in  $\text{CD}_2\text{Cl}_2$ ; \* = traces of  $\text{Mo}_2\text{P}_2$  (< 5 %).

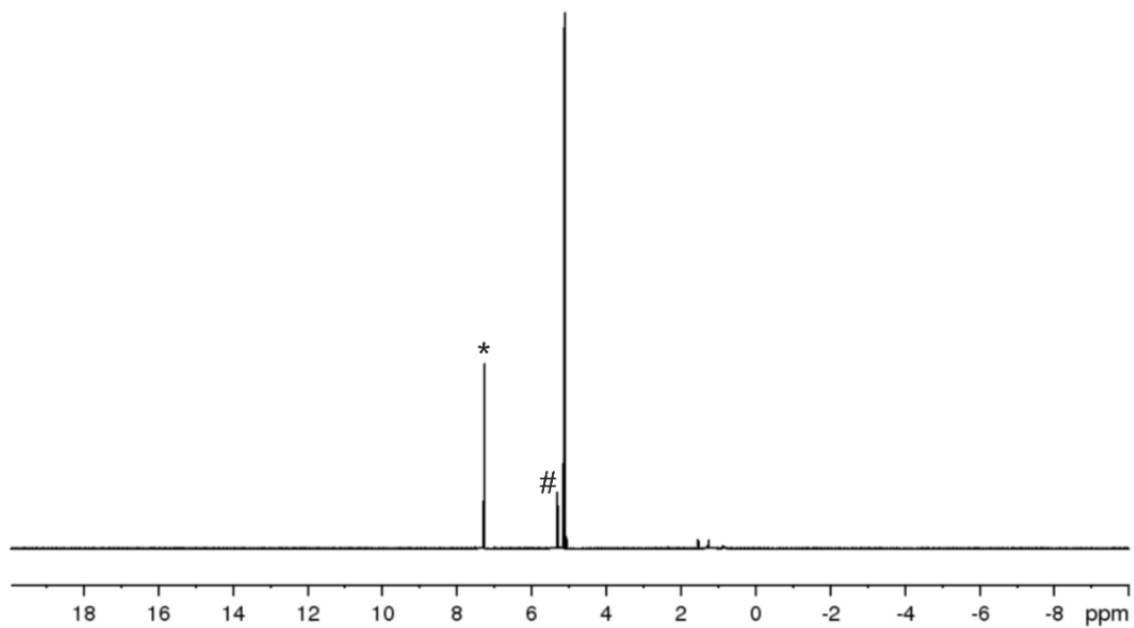

Figure S7:  $^1\text{H}$  NMR spectrum of  $[(\text{CpMo}(\text{CO})_2)_2(\mu,\eta^2:\eta^2\text{-AsSb})]$  (**3a**) in  $\text{CDCl}_3$ ; \* =  $\text{CDCl}_3$ , # = Cp of traces of  $\text{Mo}_2\text{As}_2/\text{Mo}_2\text{Sb}_2$ .

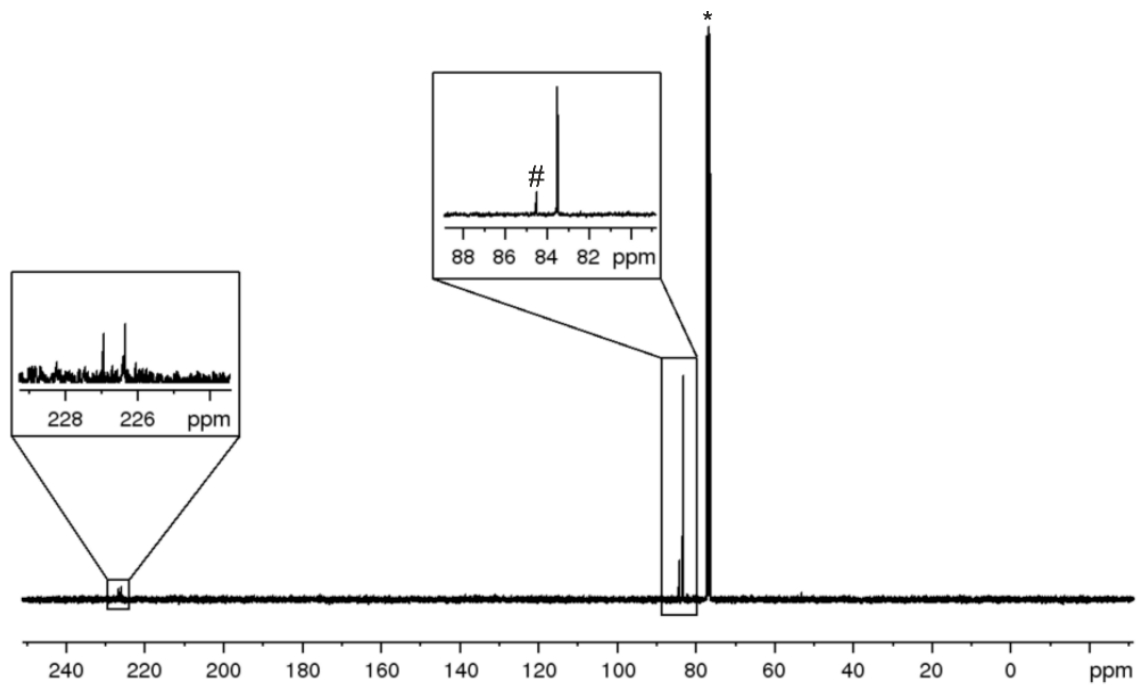

Figure S8:  $^{13}\text{C}\{^1\text{H}\}$  NMR spectrum of  $[(\text{CpMo}(\text{CO})_2)_2(\mu,\eta^2:\eta^2\text{-AsSb})]$  (**3a**) in  $\text{CDCl}_3$ ; \* =  $\text{CDCl}_3$ , # = Cp of traces of  $\text{Mo}_2\text{As}_2/\text{Mo}_2\text{Sb}_2$ .



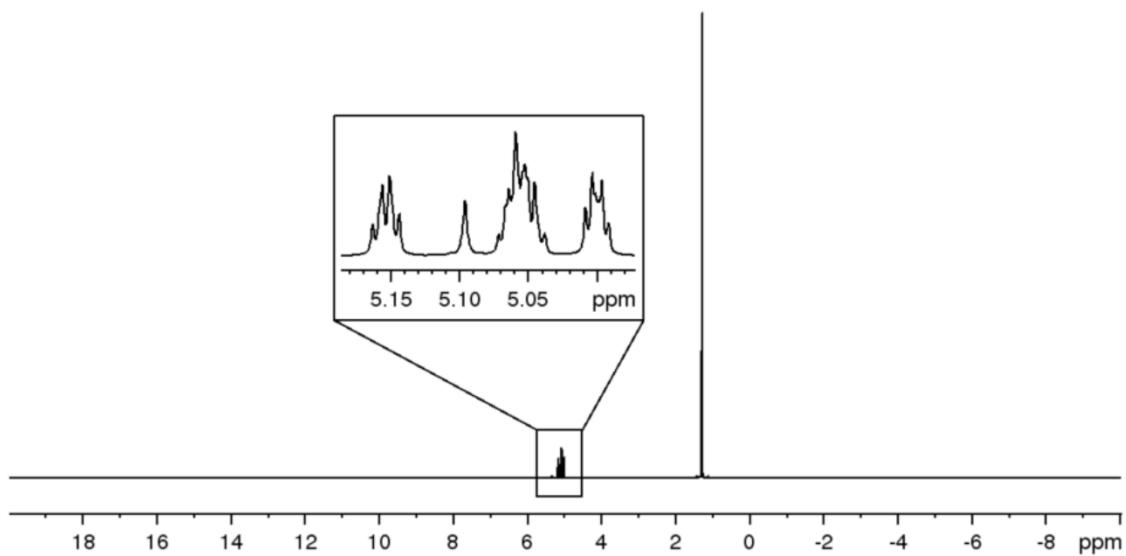

**Figure S9:**  $^1\text{H}$  NMR spectrum of  $[(\text{Cp}'\text{Mo}(\text{CO})_2)_2(\mu, \eta^2:\eta^2\text{-AsSb})]$  (**3b**) in  $\text{CD}_2\text{Cl}_2$ .

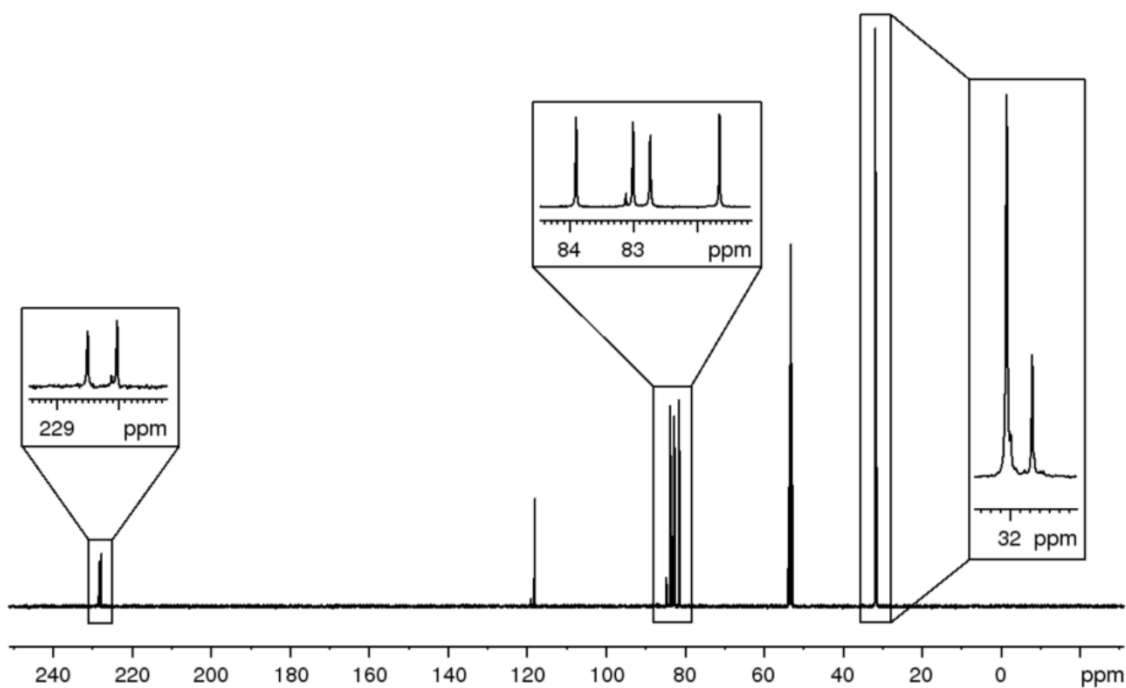

**Figure S10:**  $^{13}\text{C}\{^1\text{H}\}$  NMR spectrum of  $[(\text{Cp}'\text{Mo}(\text{CO})_2)_2(\mu, \eta^2:\eta^2\text{-AsSb})]$  (**3b**) in  $\text{CD}_2\text{Cl}_2$ .

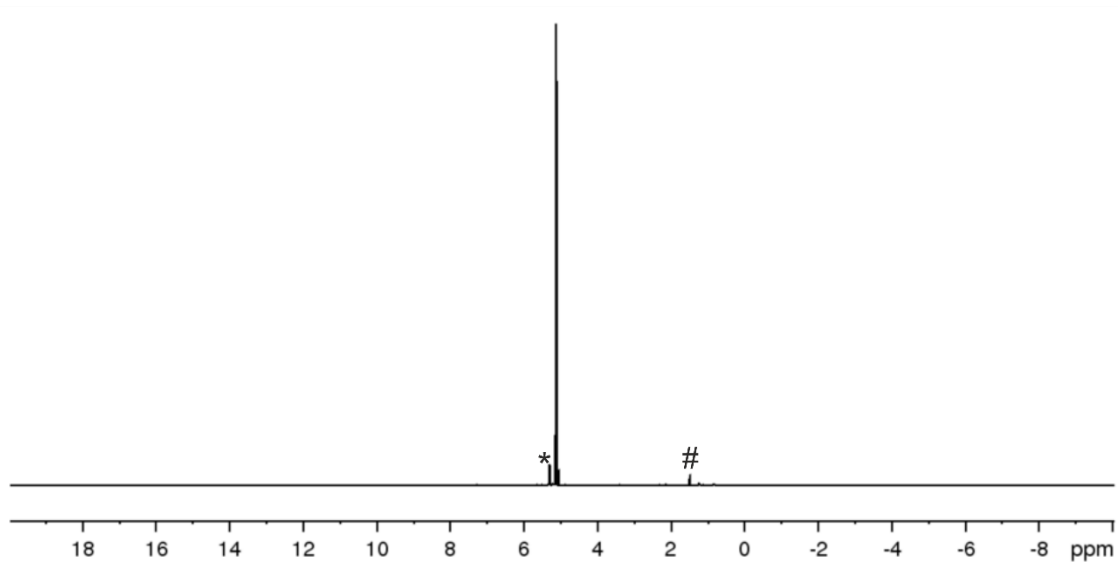

**Figure S11:**  $^1\text{H}$  NMR spectrum of  $[(\text{CpMo}(\text{CO})_2)_2(\mu,\eta^2:\eta^2\text{-AsBi})]$  (**4**) in  $\text{CD}_2\text{Cl}_2$ ; \* =  $\text{CD}_2\text{Cl}_2$ , # =  $\text{H}_2\text{O}$ .

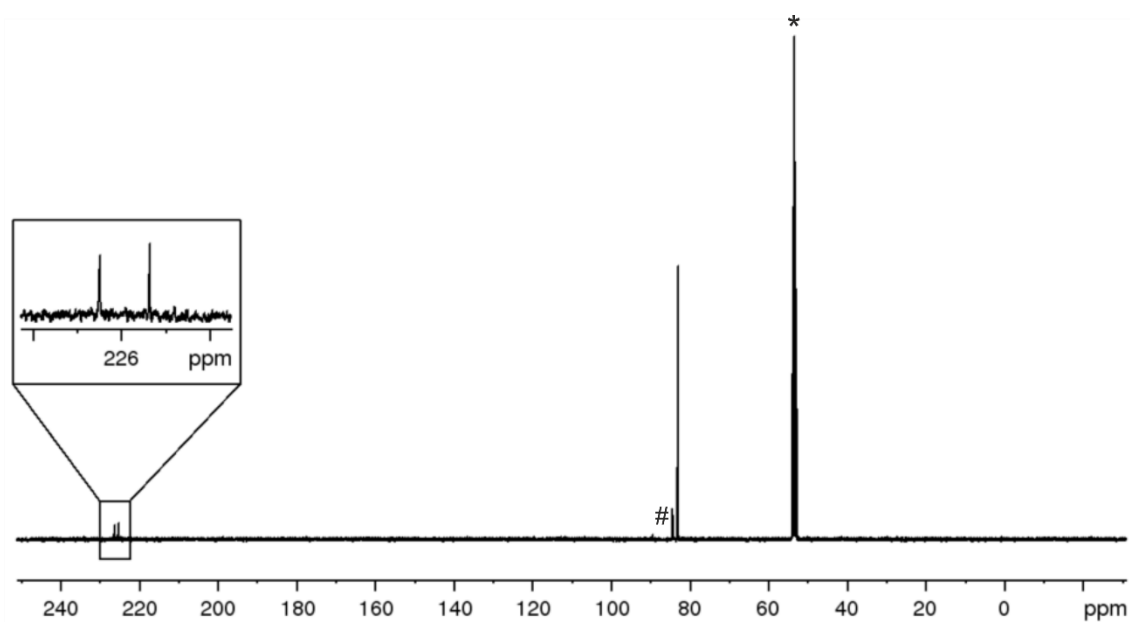

**Figure S12:**  $^{13}\text{C}\{^1\text{H}\}$  NMR spectrum of  $[(\text{CpMo}(\text{CO})_2)_2(\mu,\eta^2:\eta^2\text{-AsBi})]$  (**4**) in  $\text{CD}_2\text{Cl}_2$ ; \* =  $\text{CD}_2\text{Cl}_2$ , # = traces of  $\text{Mo}_2\text{As}_2$ .

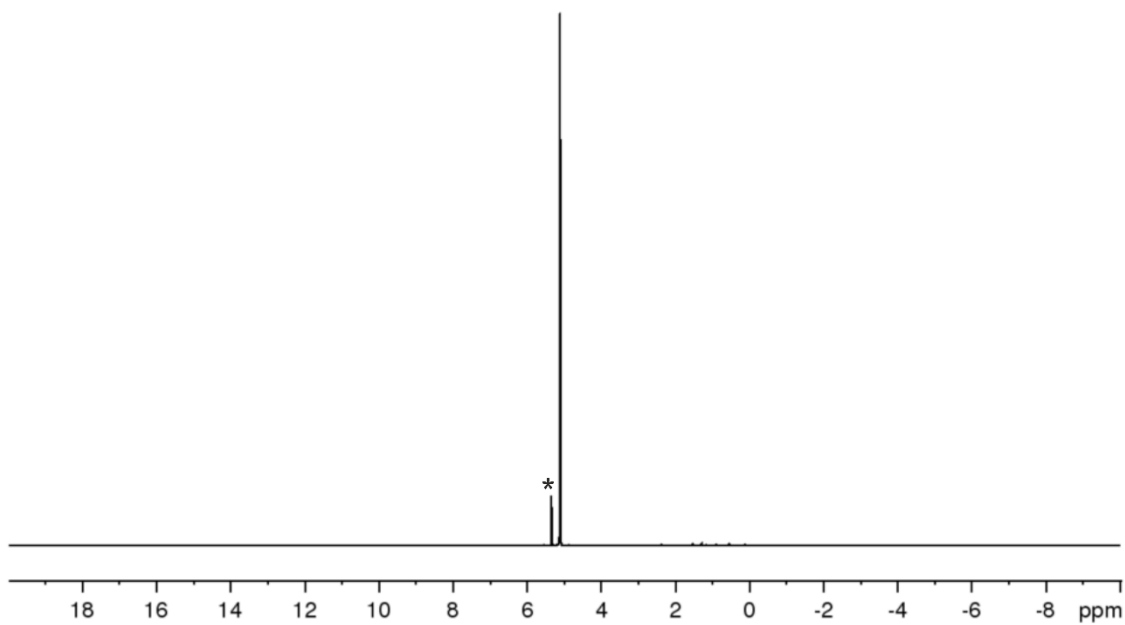

**Figure S13:**  $^1\text{H}$  NMR spectrum of  $[(\text{CpMo}(\text{CO})_2)_2(\mu,\eta^2:\eta^2\text{-SbBi})]$  (**5**) in  $\text{CD}_2\text{Cl}_2$ ; \* =  $\text{CD}_2\text{Cl}_2$ .

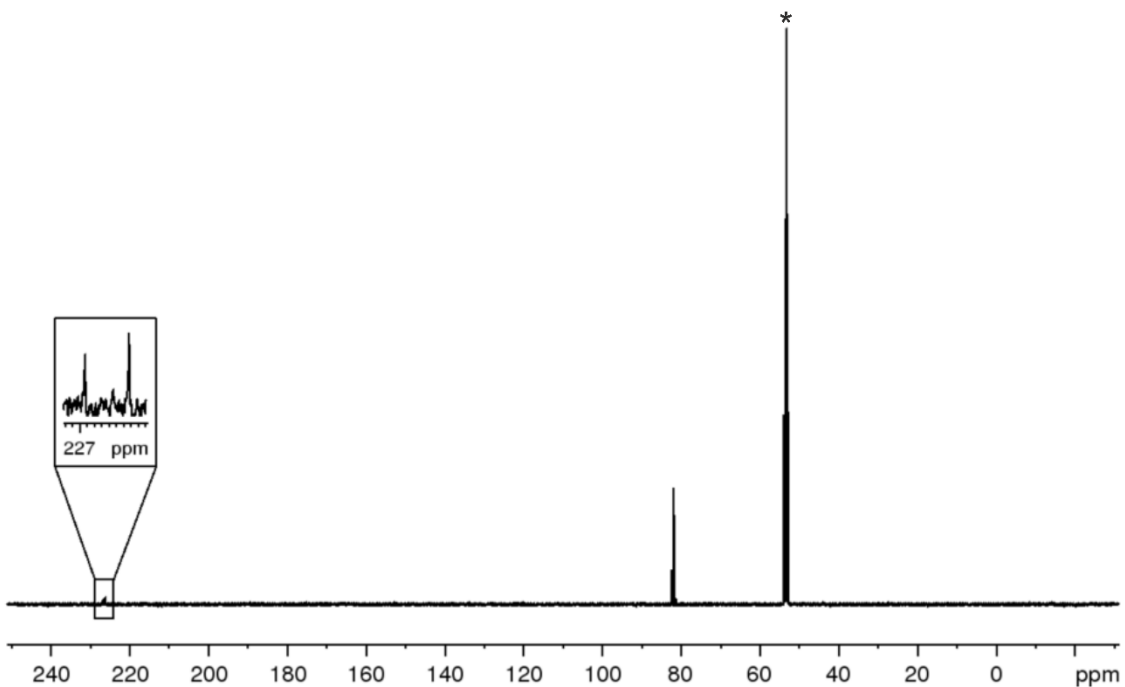

**Figure S14:**  $^{13}\text{C}\{^1\text{H}\}$  NMR spectrum of  $[(\text{CpMo}(\text{CO})_2)_2(\mu,\eta^2:\eta^2\text{-SbBi})]$  (**5**) in  $\text{CD}_2\text{Cl}_2$ ; \* =  $\text{CD}_2\text{Cl}_2$ .

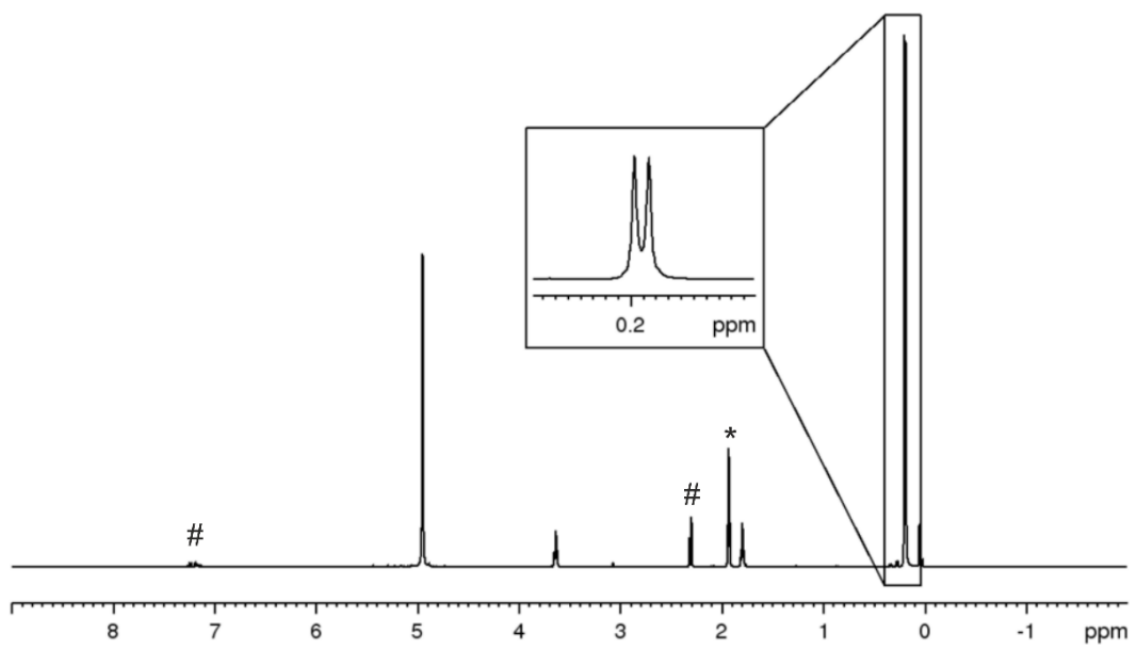

**Figure S15:**  $^1\text{H}$  NMR spectrum of  $\text{Li}[\{\text{CpMo}(\text{CO})_2\}_2\{\mu,\eta^2\text{-P}(\text{SiMe}_3)_2\}]$  (**6a**) in  $\text{CD}_3\text{CN}$ ; \* =  $\text{CD}_3\text{CN}$ , # = toluene.

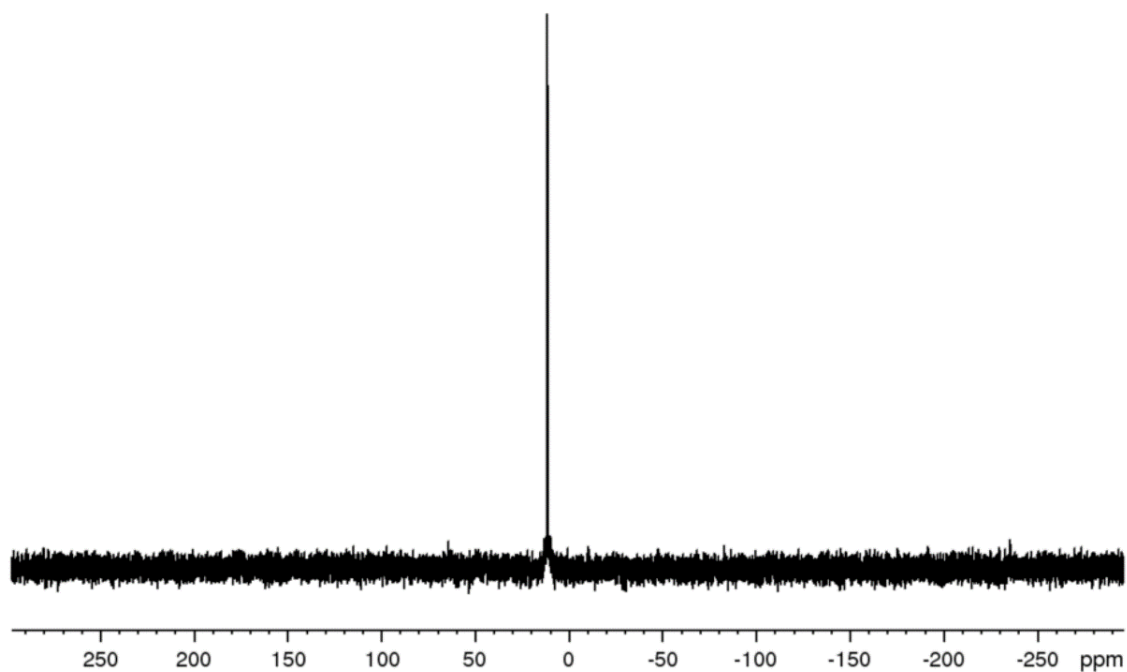

**Figure S16:**  $^{31}\text{P}$  NMR spectrum of  $\text{Li}[\{\text{CpMo}(\text{CO})_2\}_2\{\mu,\eta^2\text{-P}(\text{SiMe}_3)_2\}]$  (**6a**) in  $\text{CD}_3\text{CN}$ .

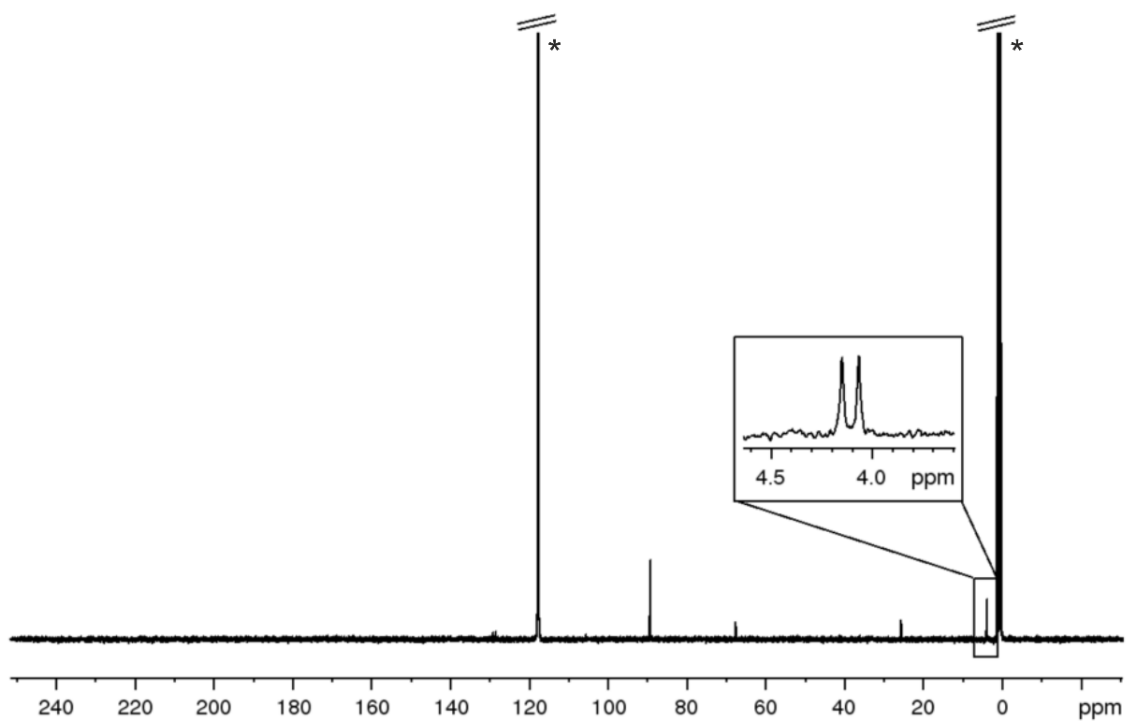

**Figure S17:**  $^{13}\text{C}\{^1\text{H}\}$  NMR spectrum of  $\text{Li}[\{\text{CpMo}(\text{CO})_2\}_2\{\mu,\eta^2\text{-P}(\text{SiMe}_3)_2\}]$  (**6a**) in  $\text{CD}_3\text{CN}$ ; \* =  $\text{CD}_3\text{CN}$ .

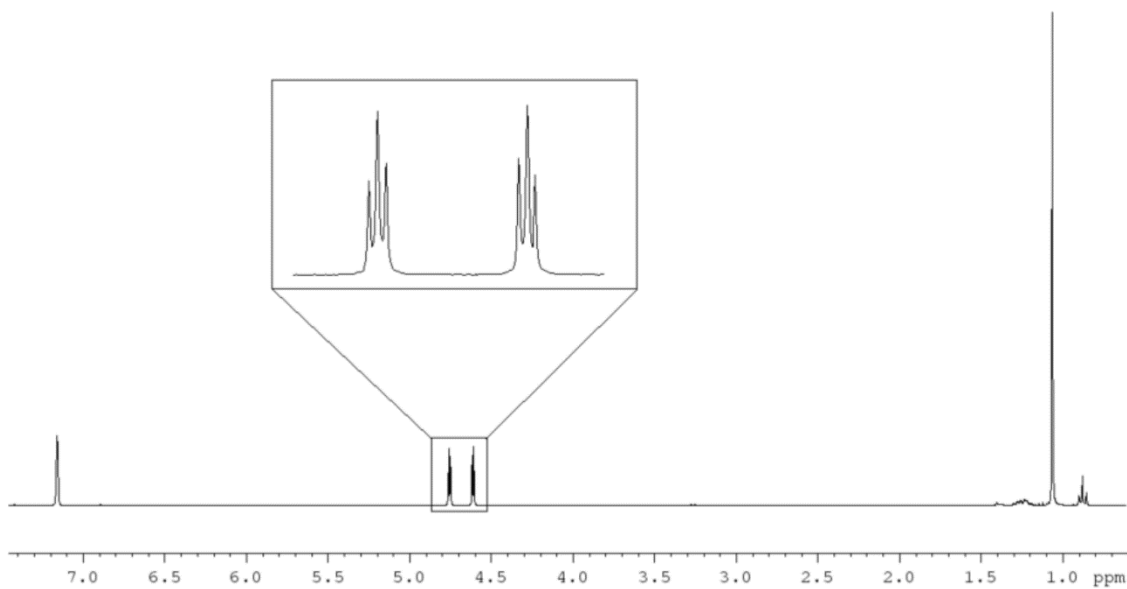

**Figure S18:**  $^1\text{H}$  NMR spectrum of  $[(\text{Cp}'\text{Mo}(\text{CO})_2)_2(\mu,\eta^2:\eta^2\text{-As}_2)]$  (**7**) in  $\text{C}_6\text{D}_6$ .

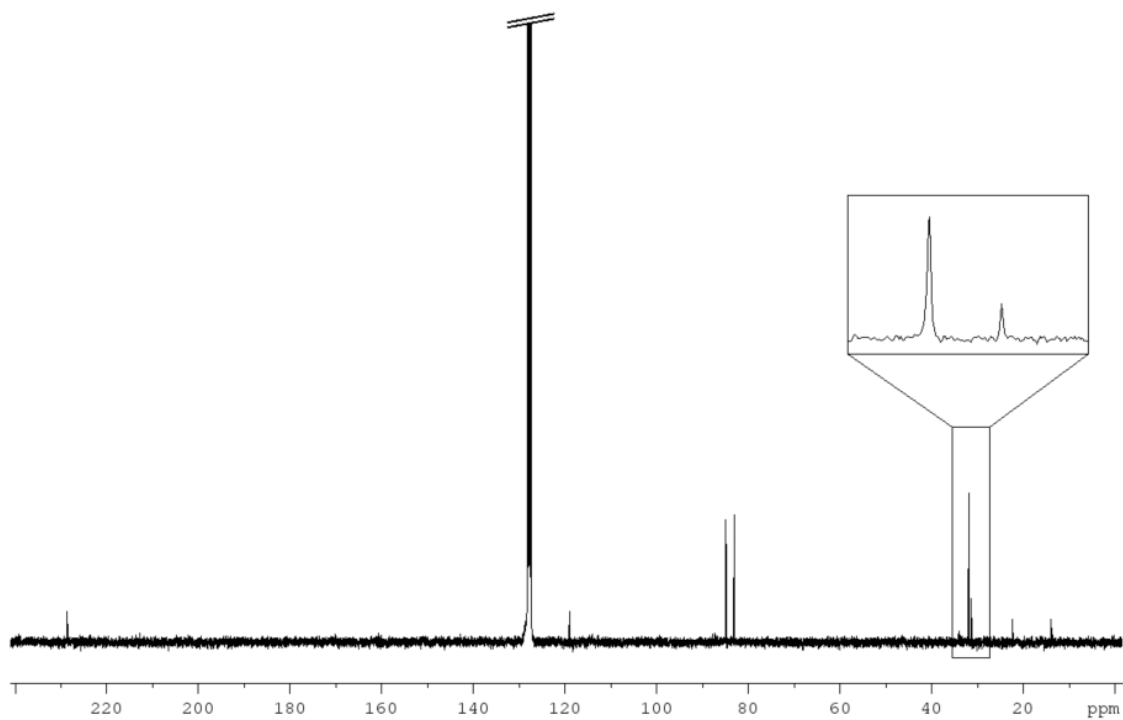

Figure S19:  $^{13}\text{C}\{^1\text{H}\}$  NMR spectrum of  $[(\text{Cp}'\text{Mo}(\text{CO})_2)_2(\mu,\eta^2:\eta^2\text{-As}_2)]$  (**7**) in  $\text{C}_6\text{D}_6$ .

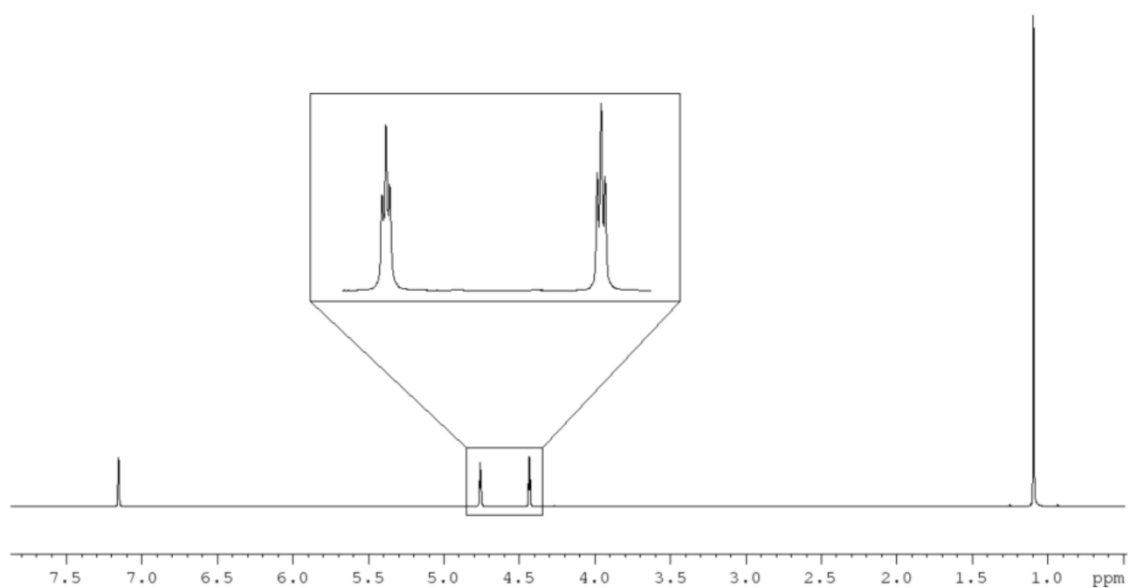

Figure S20:  $^1\text{H}$  NMR spectrum of  $[(\text{Cp}'\text{Mo}(\text{CO})_2)_2(\mu,\eta^2:\eta^2\text{-Sb}_2)]$  (**8**) in  $\text{C}_6\text{D}_6$ .

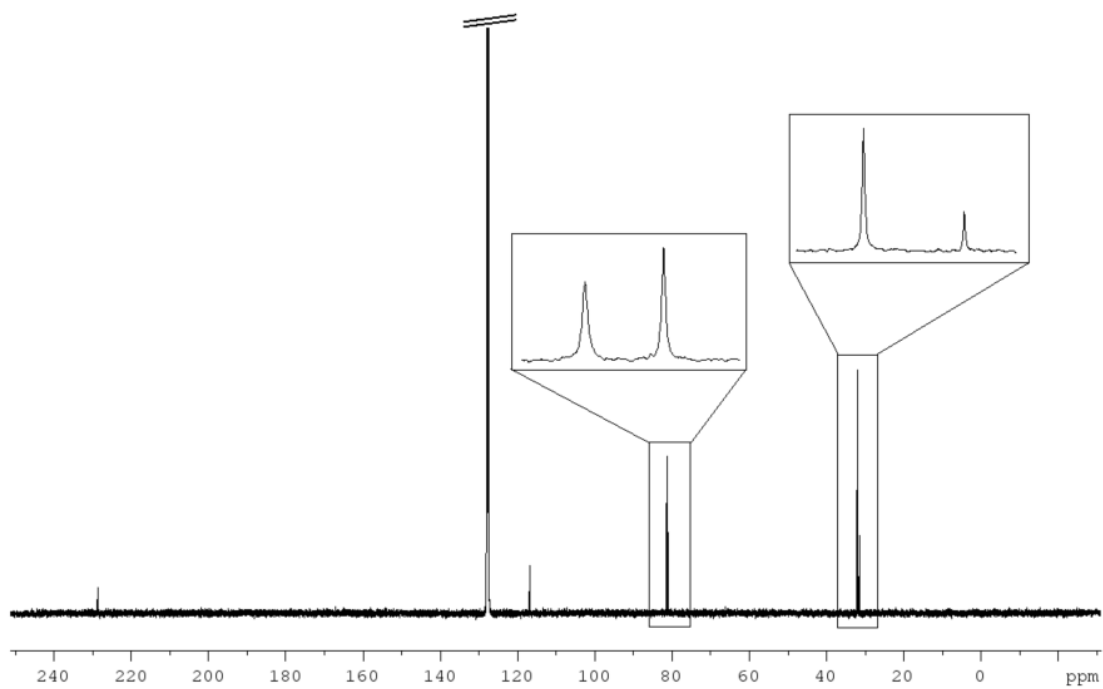

Figure S21:  $^{13}\text{C}\{^1\text{H}\}$  NMR spectrum of  $[(\text{Cp}^*\text{Mo}(\text{CO})_2)_2(\mu,\eta^2:\eta^2\text{-Sb}_2)]$  (**8**) in  $\text{C}_6\text{D}_6$ .

## IR Spectra

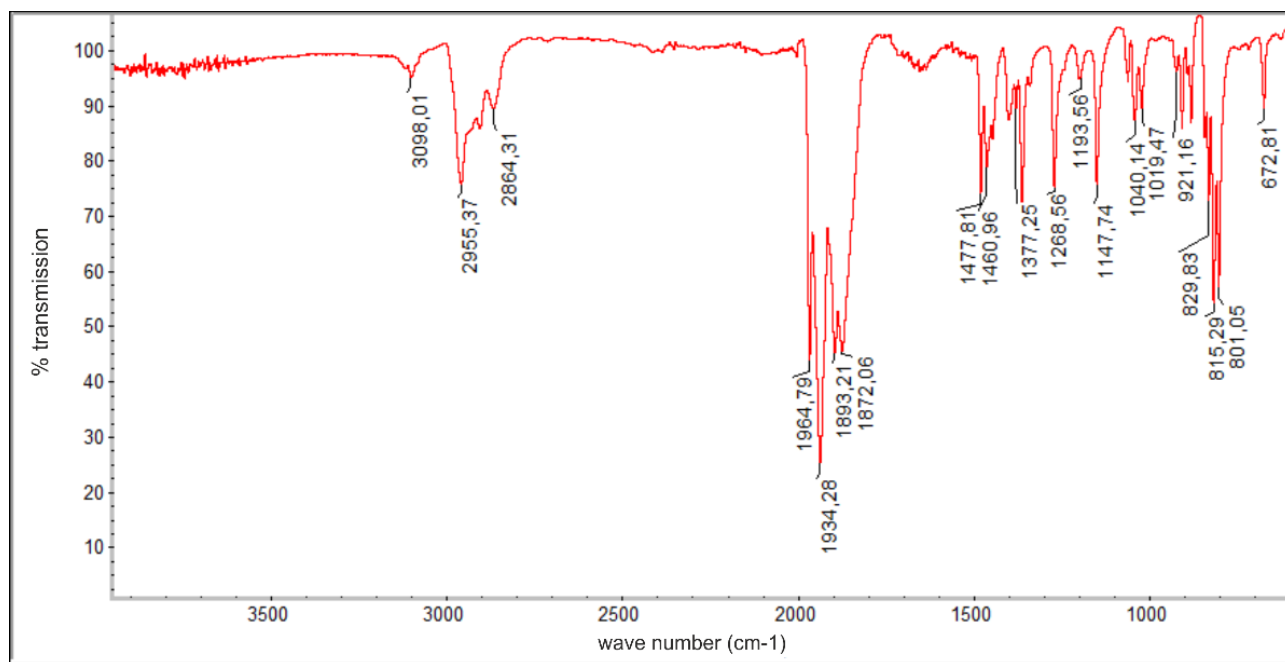

Figure S22: IR spectrum of  $[(\text{Cp}^*\text{Mo}(\text{CO})_2)_2(\mu,\eta^2:\eta^2\text{-As}_2)]$  (**7**).

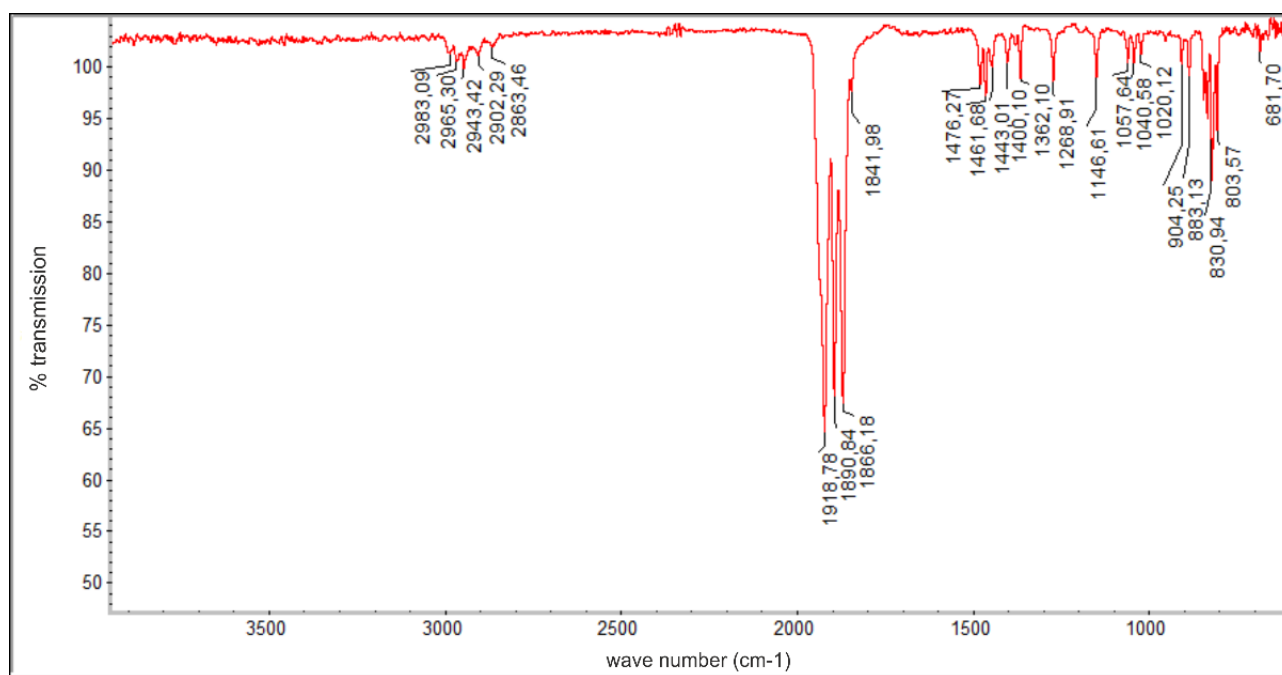

**Figure S23:** IR spectrum of  $[(\text{Cp}'\text{Mo}(\text{CO})_2)_2(\mu,\eta^2:\eta^2\text{-Sb}_2)]$  (**8**).

## X-ray crystallography

All crystal manipulations were performed under mineral oil. The diffraction experiments were performed at 123 K on a Rigaku (former Agilent Technologies or Oxford Diffraction) Gemini Ultra with an AtlasS2 detector, on a GV50 diffractometer with a TitanS2 detector or on a SuperNova Single Source diffractometer using  $\text{Cu-K}_\alpha$ ,  $\text{Cu-K}_\beta$  or  $\text{Mo-K}_\alpha$  radiation. Crystallographic data together with the details of the experiments are given in Table S4 and Table S5. The cell determination, data reduction and absorption correction for all compounds were performed with the help of the CrysAlis PRO software.<sup>[13]</sup> All structures were solved by using the programs SHELXT<sup>[14]</sup> and Olex2.<sup>[15]</sup> The full-matrix least-squares refinement against  $F^2$  was done using SHELXL<sup>[16]</sup> and Olex2.<sup>[15]</sup> If not stated otherwise, all atoms except hydrogen atoms were refined anisotropically. The H atoms were calculated geometrically and a riding model was used during the refinement process.

CIF files with comprehensive information on the details of the diffraction experiments and full tables of bond lengths and angles for **2-8** and  $[\text{Cp}'\text{Mo}(\text{CO})_2(\eta^3\text{-As}_3)]$  are deposited in Cambridge Crystallographic Data Centre (CCDC) under the deposition codes CCDC-2061901 (**2**), CCDC-2061902 (**3a**), CCDC-2061903 (**3b**), CCDC-2061904 (**4**), CCDC-2061905 (**5**), CCDC-2061906 (**6a**), CCDC-2061907 (**6b**), CCDC-2061908 (**6c**), CCDC-2061909 (**7**), CCDC-2061910 (**8**) and CCDC-2072587 ( $[\text{Cp}'\text{Mo}(\text{CO})_2(\eta^3\text{-As}_3)]$ ).

Crystallographic Data for Compound **2** was already provided by Mays *et. al.* in 1998 under the CCDC deposition code CCDC-100650.<sup>[12]</sup>



**Table S4:** Crystallographic details for the compounds **2**,<sup>[17]</sup> **3a**, **3b**, **4**, and **5**.

|                                                                                      | <b>2</b> <sup>[17]</sup>                                           | <b>3a</b>                                                           | <b>3b</b>                                                           | <b>4</b>                                                            | <b>5</b>                                                            |
|--------------------------------------------------------------------------------------|--------------------------------------------------------------------|---------------------------------------------------------------------|---------------------------------------------------------------------|---------------------------------------------------------------------|---------------------------------------------------------------------|
| formula                                                                              | C <sub>14</sub> H <sub>10</sub> O <sub>4</sub> PMo <sub>2</sub> Sb | C <sub>14</sub> H <sub>10</sub> AsMo <sub>2</sub> O <sub>4</sub> Sb | C <sub>22</sub> H <sub>26</sub> AsMo <sub>2</sub> O <sub>4</sub> Sb | C <sub>14</sub> H <sub>10</sub> O <sub>4</sub> AsMo <sub>2</sub> Bi | C <sub>14</sub> H <sub>10</sub> BiMo <sub>2</sub> O <sub>4</sub> Sb |
| weight [g·mol <sup>-1</sup> ]                                                        | 586.82                                                             | 630.77                                                              | 742.98                                                              | 718.00                                                              | 764.83                                                              |
| Temperature [K]                                                                      | 123                                                                | 123                                                                 | 122.9(3)                                                            | 123(1)                                                              | 123(2)                                                              |
| crystal system                                                                       | monoclinic                                                         | monoclinic                                                          | orthorhombic                                                        | monoclinic                                                          | monoclinic                                                          |
| space group                                                                          | <i>P2/n</i>                                                        | <i>P2/n</i>                                                         | <i>P2<sub>1</sub>2<sub>1</sub>2</i>                                 | <i>P2<sub>1</sub></i>                                               | <i>I2/a</i>                                                         |
| <i>a</i> [Å]                                                                         | 13.4669(2)                                                         | 13.5271(2)                                                          | 15.0805(5)                                                          | 8.8466(2)                                                           | 16.6083(9)                                                          |
| <i>b</i> [Å]                                                                         | 7.5991(1)                                                          | 7.6095(1)                                                           | 10.1597(3)                                                          | 7.8968(2)                                                           | 7.6109(3)                                                           |
| <i>c</i> [Å]                                                                         | 15.7859(2)                                                         | 15.7703(3)                                                          | 7.8995(2)                                                           | 11.5419(3)                                                          | 14.4656(7)                                                          |
| $\alpha$ [°]                                                                         | 90                                                                 | 90                                                                  | 90                                                                  | 90                                                                  | 90                                                                  |
| $\beta$ [°]                                                                          | 95.047(1)                                                          | 94.625(2)                                                           | 90                                                                  | 101.576(2)                                                          | 115.955(6)                                                          |
| $\gamma$ [°]                                                                         | 90                                                                 | 90                                                                  | 90                                                                  | 90                                                                  | 90                                                                  |
| Volume [Å <sup>3</sup> ]                                                             | 1609.21(4)                                                         | 1618.02(4)                                                          | 1210.31(6)                                                          | 789.91(3)                                                           | 1644.1(2)                                                           |
| <i>Z</i>                                                                             | 4                                                                  | 4                                                                   | 2                                                                   | 2                                                                   | 4                                                                   |
| $\rho_{calc}$ [g·cm <sup>-3</sup> ]                                                  | 2.422                                                              | 2.589                                                               | 2.039                                                               | 3.019                                                               | 3.090                                                               |
| $\mu$ [mm <sup>-1</sup> ]                                                            | 26.861                                                             | 28.052                                                              | 14.150                                                              | 36.782                                                              | 13.799                                                              |
| <i>F</i> (000)                                                                       | 1104.0                                                             | 1176.0                                                              | 716.0                                                               | 652.0                                                               | 1376.0                                                              |
| crystal size [mm <sup>3</sup> ]                                                      | 0.218 × 0.152 × 0.069                                              | 0.126 × 0.097 × 0.072                                               | 0.427 × 0.277 × 0.162                                               | 0.197 × 0.095 × 0.073                                               | 0.703 × 0.306 × 0.281                                               |
| diffractometer                                                                       | Gemini Ultra                                                       | Gemini Ultra                                                        | GV50                                                                | GV50                                                                | Gemini Ultra                                                        |
| absorption correction                                                                | gaussian                                                           | gaussian                                                            | gaussian                                                            | gaussian                                                            | analytical                                                          |
| <i>T</i> <sub>min</sub> / <i>T</i> <sub>max</sub>                                    | 0.343 / 0.668                                                      | 0.575 / 0.678                                                       | 0.003 / 0.234                                                       | 0.023 / 0.277                                                       | 0.014 / 0.122                                                       |
| radiation [Å]                                                                        | Cu-K $\alpha$ ( $\lambda$ = 1.54184)                               | Cu-K $\alpha$ ( $\lambda$ = 1.54184)                                | Cu-K $\beta$ ( $\lambda$ = 1.39222)                                 | Cu-K $\alpha$ ( $\lambda$ = 1.54184)                                | Mo-K $\alpha$ ( $\lambda$ = 0.71073)                                |
| 2 $\theta$ range [°]                                                                 | 8.278 to 133.49                                                    | 8.288 to 133.458                                                    | 9.478 to 120.36                                                     | 7.818 to 147.3                                                      | 7.3 to 62.908                                                       |
| completeness [%]                                                                     | 99.3                                                               | 99.4                                                                | 99.9                                                                | 98.6                                                                | 99.7                                                                |
| reflns collected / unique                                                            | 8840 / 2827                                                        | 8891 / 2846                                                         | 6312 / 2418                                                         | 7411 / 3149                                                         | 7351 / 2599                                                         |
| <i>R</i> <sub>int</sub> / <i>R</i> <sub>sigma</sub>                                  | 0.0330 / 0.0336                                                    | 0.0315 / 0.0307                                                     | 0.1318 / 0.0866                                                     | 0.0455 / 0.0344                                                     | 0.0333 / 0.0303                                                     |
| data / restraints / parameters                                                       | 2827 / 66 / 210                                                    | 2846 / 72 / 217                                                     | 2418 / 0 / 139                                                      | 3149 / 146 / 218                                                    | 2599 / 0 / 100                                                      |
| GOF on <i>F</i> <sup>2</sup>                                                         | 1.185                                                              | 1.100                                                               | 1.056                                                               | 1.097                                                               | 1.093                                                               |
| <i>R</i> <sub>1</sub> / <i>wR</i> <sub>2</sub> [ <i>I</i> ≥ 2 $\sigma$ ( <i>I</i> )] | 0.0331 / 0.0850                                                    | 0.0263 / 0.0617                                                     | 0.0746 / 0.1934                                                     | 0.0468 / 0.1212                                                     | 0.0317 / 0.0801                                                     |
| <i>R</i> <sub>1</sub> / <i>wR</i> <sub>2</sub> [all data]                            | 0.0349 / 0.0864                                                    | 0.0306 / 0.0636                                                     | 0.0761 / 0.1944                                                     | 0.0476 / 0.1215                                                     | 0.0336 / 0.0812                                                     |
| max / min $\Delta\rho$ [e·Å <sup>-3</sup> ]                                          | 1.02 / -1.59                                                       | 0.68 / -1.30                                                        | 2.88 / -1.54                                                        | 2.34 / -2.15                                                        | 0.96 / -2.22                                                        |
| identification code                                                                  | LD185_CR003_abs                                                    | LD190_CR008_abs                                                     | LD153_F1_abs                                                        | CR492_Cua                                                           | LD233_abs                                                           |

**Table S5:** Crystallographic details for the compounds **6a**, **6b**, **6c**, **7** and **8**.

|                                                                                      | <b>6a</b>                                                                          | <b>6b</b>                                                                           | <b>6c</b>                                                                            | <b>7</b>                                                                       | <b>8</b>                                                                       |
|--------------------------------------------------------------------------------------|------------------------------------------------------------------------------------|-------------------------------------------------------------------------------------|--------------------------------------------------------------------------------------|--------------------------------------------------------------------------------|--------------------------------------------------------------------------------|
| formula                                                                              | C <sub>36</sub> H <sub>60</sub> LiMo <sub>2</sub> O <sub>12</sub> PSi <sub>2</sub> | C <sub>36</sub> H <sub>60</sub> AsLiMo <sub>2</sub> O <sub>12</sub> Si <sub>2</sub> | C <sub>42</sub> H <sub>71</sub> KMo <sub>2</sub> O <sub>12.5</sub> SbSi <sub>2</sub> | C <sub>22</sub> H <sub>26</sub> As <sub>2</sub> Mo <sub>2</sub> O <sub>4</sub> | C <sub>22</sub> H <sub>26</sub> O <sub>4</sub> Mo <sub>2</sub> Sb <sub>2</sub> |
| weight [g·mol <sup>-1</sup> ]                                                        | 970.81                                                                             | 1014.76                                                                             | 1184.89                                                                              | 696.15                                                                         | 789.81                                                                         |
| Temperature [K]                                                                      | 123(1)                                                                             | 123(1)                                                                              | 123(1)                                                                               | 123(1)                                                                         | 123.0(1)                                                                       |
| crystal system                                                                       | monoclinic                                                                         | monoclinic                                                                          | triclinic                                                                            | monoclinic                                                                     | orthorhombic                                                                   |
| space group                                                                          | <i>P2<sub>1</sub>/n</i>                                                            | <i>P2<sub>1</sub>/c</i>                                                             | <i>P-1</i>                                                                           | <i>P2<sub>1</sub>/c</i>                                                        | <i>P2<sub>1</sub>2<sub>1</sub>2</i>                                            |
| <i>a</i> [Å]                                                                         | 23.081(1)                                                                          | 12.4933(1)                                                                          | 9.7702(2)                                                                            | 10.3882(3)                                                                     | 15.1466(4)                                                                     |
| <i>b</i> [Å]                                                                         | 9.2777(3)                                                                          | 18.7395(2)                                                                          | 14.1024(3)                                                                           | 14.8930(3)                                                                     | 10.2347(3)                                                                     |
| <i>c</i> [Å]                                                                         | 12.4744(6)                                                                         | 18.9341(2)                                                                          | 19.0574(5)                                                                           | 15.2218(3)                                                                     | 7.8972(3)                                                                      |
| $\alpha$ [°]                                                                         | 90                                                                                 | 90                                                                                  | 85.172(2)                                                                            | 90                                                                             | 90                                                                             |
| $\beta$ [°]                                                                          | 125.121(7)                                                                         | 92.476(1)                                                                           | 84.141(2)                                                                            | 90.911(2)                                                                      | 90                                                                             |
| $\gamma$ [°]                                                                         | 90                                                                                 | 90                                                                                  | 85.419(2)                                                                            | 90                                                                             | 90                                                                             |
| Volume [Å <sup>3</sup> ]                                                             | 2185.0(2)                                                                          | 4428.68(8)                                                                          | 2596.1(1)                                                                            | 2354.7(1)                                                                      | 1224.23(7)                                                                     |
| <i>Z</i>                                                                             | 2                                                                                  | 4                                                                                   | 2                                                                                    | 4                                                                              | 2                                                                              |
| $\rho_{calc}$ [g·cm <sup>-3</sup> ]                                                  | 1.476                                                                              | 1.522                                                                               | 1.516                                                                                | 1.964                                                                          | 2.143                                                                          |
| $\mu$ [mm <sup>-1</sup> ]                                                            | 6.037                                                                              | 6.445                                                                               | 7.165                                                                                | 3.880                                                                          | 19.358                                                                         |
| <i>F</i> (000)                                                                       | 1004.0                                                                             | 2080.0                                                                              | 1210.0                                                                               | 1360.0                                                                         | 752.0                                                                          |
| crystal size [mm <sup>3</sup> ]                                                      | 0.211 × 0.127 × 0.064                                                              | 0.474 × 0.231 × 0.129                                                               | 0.414 × 0.338 × 0.085                                                                | 0.958 × 0.553 × 0.381                                                          | 0.235 × 0.143 × 0.048                                                          |
| diffractometer                                                                       | Gemini Ultra                                                                       | Gemini Ultra                                                                        | GV50                                                                                 | Gemini Ultra                                                                   | GV50                                                                           |
| absorption correction                                                                | analytical                                                                         | analytical                                                                          | gaussian                                                                             | analytical                                                                     | gaussian                                                                       |
| <i>T</i> <sub>min</sub> / <i>T</i> <sub>max</sub>                                    | 0.497 / 0.730                                                                      | 0.140 / 0.480                                                                       | 0.219 / 1.000                                                                        | 0.494 / 0.741                                                                  | 0.298 / 0.858                                                                  |
| radiation [Å]                                                                        | Cu-K $\alpha$ ( $\lambda$ = 1.54184)                                               | Cu-K $\alpha$ ( $\lambda$ = 1.54184)                                                | Cu-K $\beta$ ( $\lambda$ = 1.39222)                                                  | Mo-K $\alpha$ ( $\lambda$ = 0.71073)                                           | Cu-K $\beta$ ( $\lambda$ = 1.39222)                                            |
| 2 $\theta$ range [°]                                                                 | 7.092 to 132.046                                                                   | 7.082 to 148.448                                                                    | 5.694 to 149.958                                                                     | 7.134 to 70.64                                                                 | 9.416 to 120.458                                                               |
| completeness [%]                                                                     | 99.5                                                                               | 99.4                                                                                | 99.2                                                                                 | 99.9                                                                           | 99.7                                                                           |
| reflns collected / unique                                                            | 11658 / 3794                                                                       | 27585 / 8866                                                                        | 41532 / 14134                                                                        | 88121 / 10042                                                                  | 4114 / 2248                                                                    |
| <i>R</i> <sub>int</sub> / <i>R</i> <sub>sigma</sub>                                  | 0.0272 / 0.0284                                                                    | 0.0291 / 0.0257                                                                     | 0.0562 / 0.0454                                                                      | 0.0535 / 0.0283                                                                | 0.0333 / 0.0479                                                                |
| data / restraints / parameters                                                       | 3794 / 693 / 465                                                                   | 8866 / 156 / 602                                                                    | 14134 / 0 / 529                                                                      | 10042 / 0 / 307                                                                | 2248 / 0 / 139                                                                 |
| GOF on <i>F</i> <sup>2</sup>                                                         | 1.061                                                                              | 1.055                                                                               | 1.136                                                                                | 1.105                                                                          | 1.031                                                                          |
| <i>R</i> <sub>1</sub> / <i>wR</i> <sub>2</sub> [ <i>I</i> ≥ 2 $\sigma$ ( <i>I</i> )] | 0.0235 / 0.0570                                                                    | 0.0341 / 0.0932                                                                     | 0.0793 / 0.1999                                                                      | 0.0255 / 0.0554                                                                | 0.0337 / 0.0821                                                                |
| <i>R</i> <sub>1</sub> / <i>wR</i> <sub>2</sub> [all data]                            | 0.0268 / 0.0588                                                                    | 0.0374 / 0.0964                                                                     | 0.0892 / 0.2061                                                                      | 0.0331 / 0.0578                                                                | 0.0366 / 0.0849                                                                |
| max / min $\Delta\rho$ [e·Å <sup>-3</sup> ]                                          | 0.72 / -0.43                                                                       | 1.02 / -0.52                                                                        | 4.86 / -2.23                                                                         | 0.73 / -1.03                                                                   | 0.60 / -1.50                                                                   |
| identification code                                                                  | CR326_GemCua                                                                       | CR327_Cua                                                                           | LD370_CR328                                                                          | LD444_Fr2_abs                                                                  | LD151_2_abs                                                                    |

### Refinement details for 2:

Compound **2** can be regarded as isostructural to the compounds **1**, **3a**, **4** and **5**. It crystallizes in the monoclinic space group  $P2/n$  with two half molecules in the asymmetric unit. The refinement of the crystal structure could be done without any difficulty. The **PSb** ligands within the tetrahedral complexes exhibit a disorder over the two sites in a ratio of 50:50 (Figure S24). The anisotropic displacement parameters (ADP) of one Cp ring and one **PSb** ligand were restrained by SIMU commands.

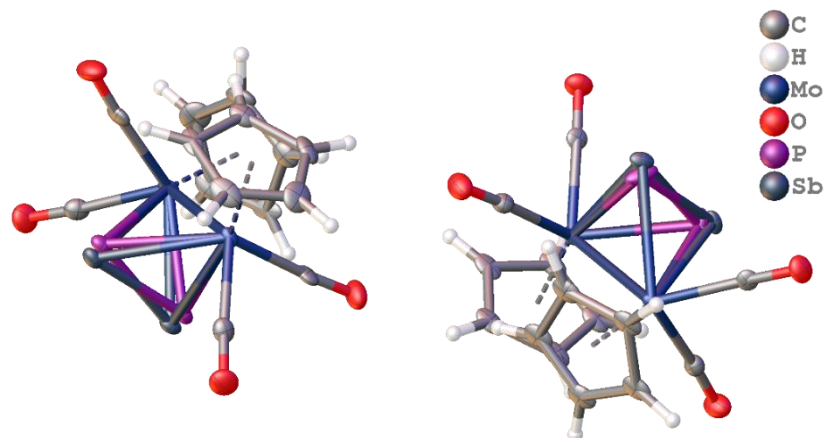

**Figure S24:** X-ray structure of **2**. The grown structure of the asymmetric unit, which contains two half molecules of **2**, is shown.

### Refinement details for 3a:

Compound **3a** can be regarded as isostructural to the compounds **1**, **2**, **4** and **5**. It crystallizes in the monoclinic space group  $P2/n$  with two half molecules in the asymmetric unit. The refinement of the crystal structure could be done without any difficulty. The **AsSb** ligands within the tetrahedral complexes exhibit a disorder over the two sites in a ratio of 50:50 (Figure S25). The ADPs of one Cp ring and the two **AsSb** ligands were restrained by SIMU commands.

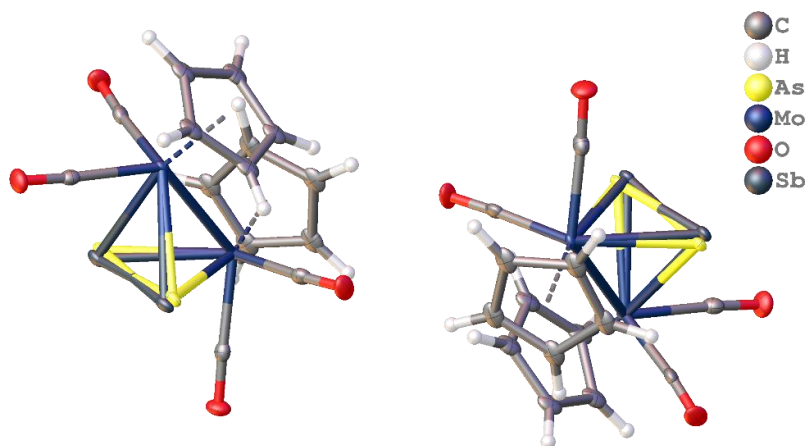

**Figure S25:** X-ray structure of **3a**. The grown structure of the asymmetric unit, which contains two half molecules of **2**, is shown.

### Refinement details for 3b:

Compound **3b** can be regarded as isostructural to the compounds **7** and **8**. It crystallizes in the orthorhombic space group  $P2_12_12$  with one half molecule in the asymmetric unit. The refinement of the crystal structure could be done without any difficulty. The **AsSb** ligand within the tetrahedral complexes exhibits a disorder over the two sites in a ratio of 50:50 (Figure S26). The disorder was refined by using a EXYZ command as the As and Sb atoms sit on the same position.

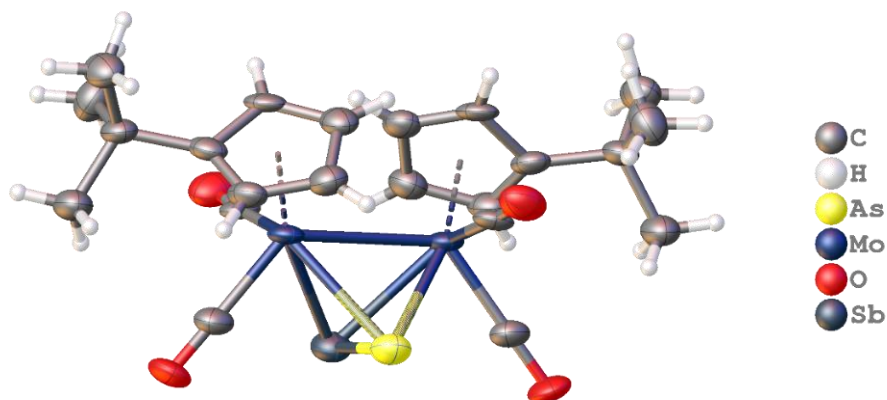

Figure S26: X-ray structure of **3b**. The grown structure of the asymmetric unit, which contains a half molecule of **3b**, is shown.

### Refinement details for 4:

Compound **4** can be regarded as isostructural to the compounds **1**, **2**, **3a** and **5**. It crystallizes in the monoclinic space group  $P2_1$  with one molecule in the asymmetric unit. The refinement of the crystal structure could be done without any difficulty. The **AsBi** ligand within the tetrahedral complex exhibits a disorder over the two sites in ratio of 76:24 (Figure S27). The ADPs of the Cp rings, the two **AsSb** ligands and two CO ligands were restrained by SIMU commands. The **AsBi** ligands were restrained with a SADI command.

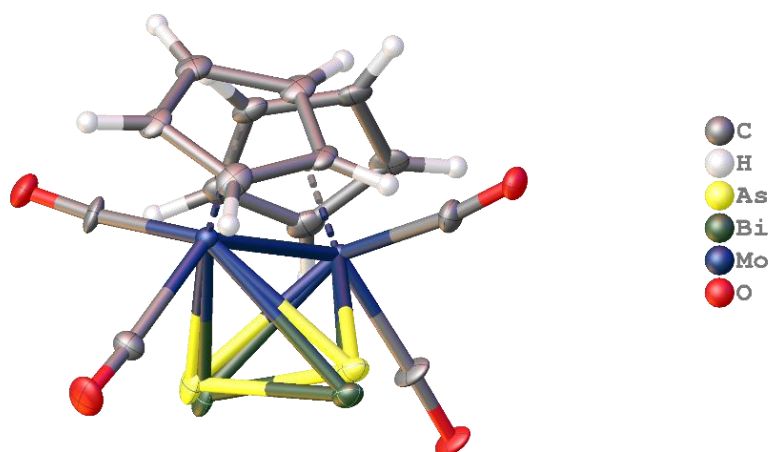

Figure S27: X-ray structure of **4**.

### Refinement details for 5:

Compound **5** can be regarded as isostructural to the compounds **1**, **2**, **3a** and **4**. It crystallizes in the monoclinic space group  $I2/a$  with one half molecule in the asymmetric unit. The refinement of the crystal structure could be done without any difficulty. The **SbBi** ligand within the tetrahedral complex exhibits a disorder over the two sites in ratio of 50:50 (Figure S27). The disorder was refined by using a EXYZ command as the Sb and Bi atoms sit on the same position.

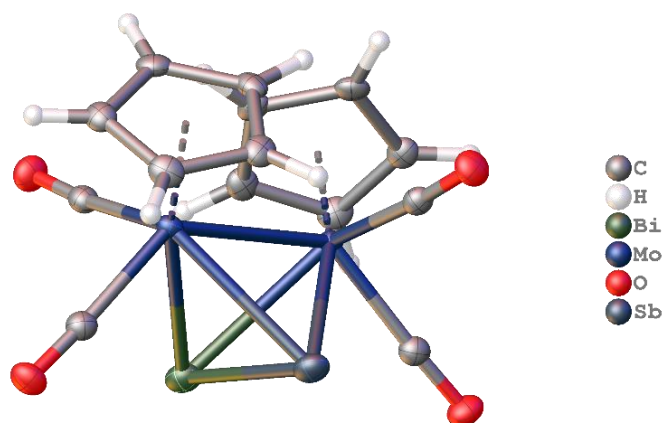

**Figure S28:** X-ray structure of **5**. The grown structure of the asymmetric unit, which contains one half molecule of **5**, is shown.

### Refinement details for 6a:

Compound **6a** can be regarded as isostructural to the compounds **6b** and **6c**. It crystallizes in the monoclinic space group  $P2/n$  with one half anion  $[\{\text{CpMo}(\text{CO})_2\}_2\{\mu\text{-P}(\text{SiMe}_3)_2\}]^-$ , one half  $\text{Li}^+$  cation and one crown-ether (12-crown-4) in the asymmetric unit. The refinement of the crystal structure could be done without any difficulty. Overall, two crown-ethers are coordinating the lithium ion and each exhibits a threefold disorder in a ratio of 50:33:17 (Figure S29). The disordered crown-ethers were restrained by several DFIX, and the ADPs with SIMU commands.

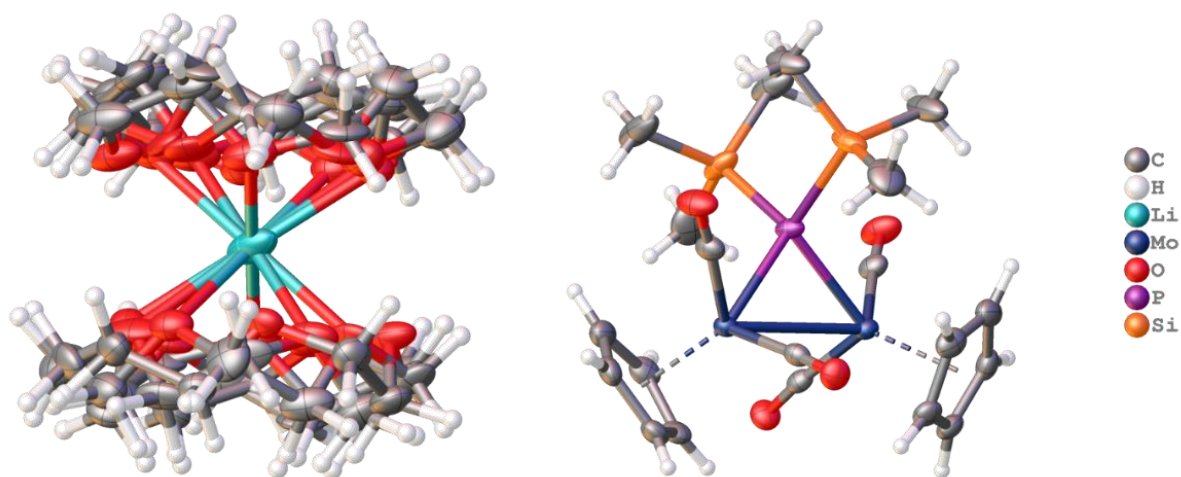

**Figure S29:** X-ray structure of **6a**. Left: Lithium cation coordinated by two disordered crown-ethers (12-crown-4); right: anionic part of **6a**.

### Refinement details for 6b:

Compound **6b** can be regarded as isostructural to the compounds **6a** and **6c**. It crystallizes in the monoclinic space group  $P2_1/c$  with one anion  $[\{\text{CpMo}(\text{CO})_2\}_2\{\mu\text{-As}(\text{SiMe}_3)_2\}]^-$ , one  $\text{Li}^+$  cation and two crown-ethers (12-crown-4) in the asymmetric unit. The refinement of the crystal structure could be done without any difficulty. The two crown-ethers are coordinating the lithium ion. One of them exhibits a disorder in a ratio of 70:30 (Figure S30). The ADPs of the disordered crown-ether were restrained by SIMU and RIGU commands.

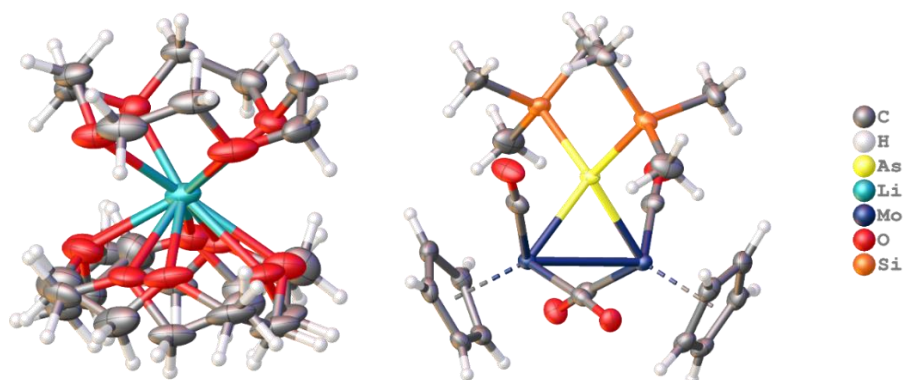

**Figure S30:** X-ray structure of **6b**. Left: Lithium cation coordinated by one ordered and one disordered crown-ether (12-crown-4); right: anionic part of **6b**.

### Refinement details for 6c:

Compound **6c** can be regarded as isostructural to the compounds **6a** and **6b**. It crystallizes in the triclinic space group  $P-1$  with one anion  $[\{\text{CpMo}(\text{CO})_2\}_2\{\mu\text{-Sb}(\text{SiMe}_3)_2\}]^-$ , one  $\text{K}^+$  cation, one crown-ether (18-crown-6) and two THF molecules in the asymmetric unit. The refinement of the crystal structure could be done without any difficulty. The potassium cation is coordinated by the crown-ether and the two THF molecules (Figure S31). A solvent mask was calculated and 41 electrons were found in a volume of  $171 \text{ \AA}^3$  in two voids per unit cell. This is consistent with the presence of half THF per asymmetric unit, which accounts for 40 electrons per unit cell.

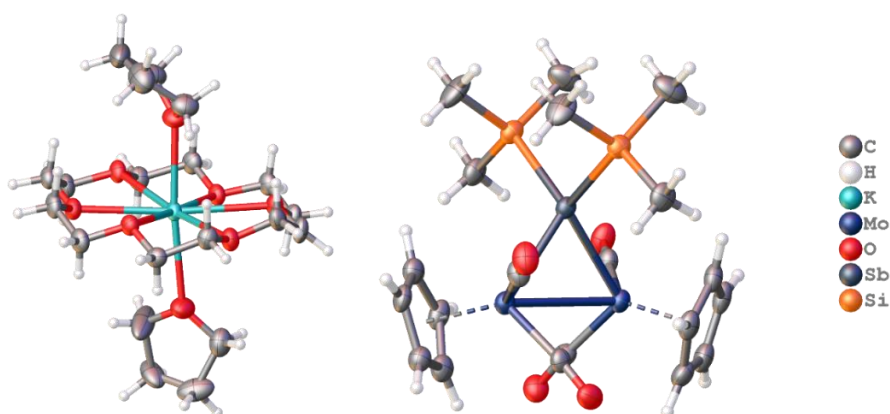

**Figure S31:** X-ray structure of **6c**. Left: Potassium cation coordinated by one crown-ether (18-crown-6) and two THF molecules; right: anionic part of **6c**.

### Refinement details for 7:

Compound **7** can be regarded as isostructural to the compounds **3b** and **8**. It crystallizes in the monoclinic space group  $P2_1/c$  with one molecule in the asymmetric unit. The refinement of the crystal structure could be done without any difficulty. One of the *tert*-butyl-groups shows a rotational disorder with a ratio of 78:22 (Figure S32).

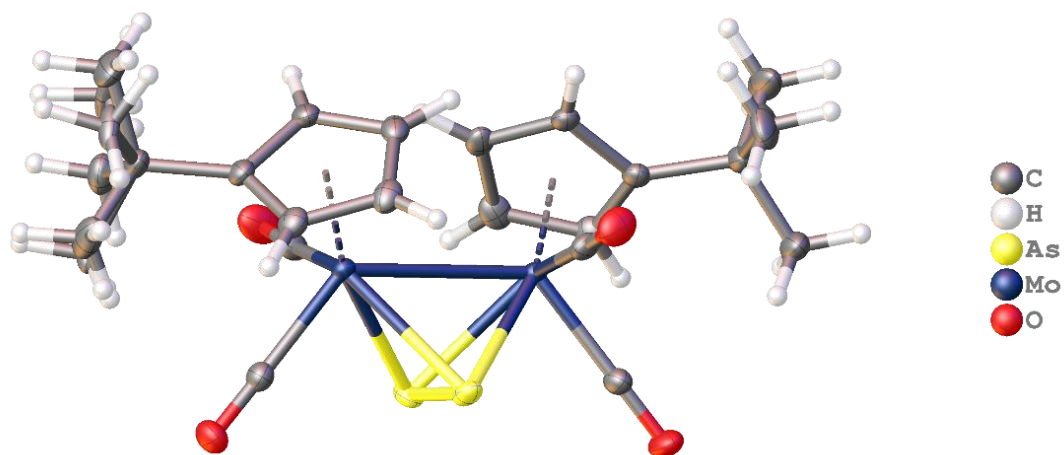

Figure S32: X-ray structure of **7**.

### Refinement details for 8:

Compound **8** can be regarded as isostructural to the compounds **3b** and **7**. It crystallizes in the orthorhombic space group  $P2_12_12$  with one half molecule in the asymmetric unit. The refinement of the crystal structure could be done without any difficulty (Figure S33).

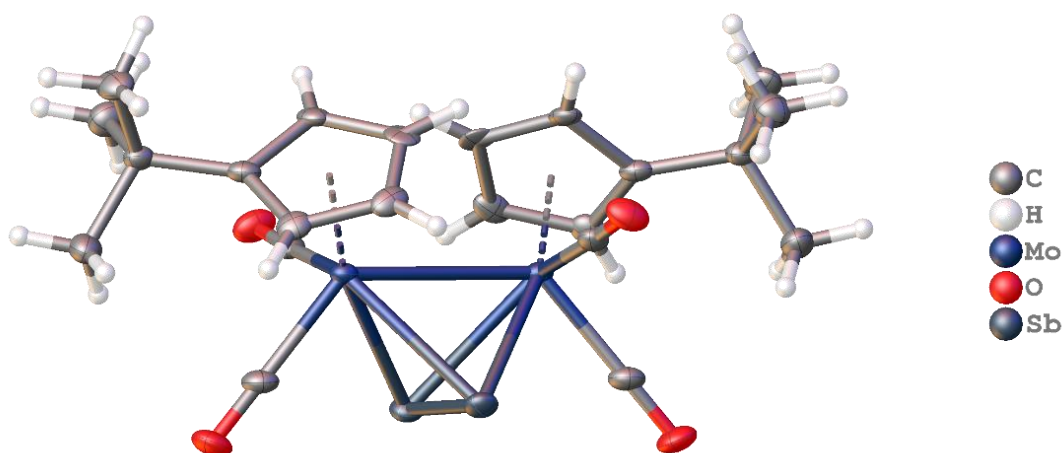

Figure S33: X-ray structure of **8**. The grown structure of the asymmetric unit, which contains one half molecule of **8**, is shown.

## Refinement details for [Cp'Mo(CO)<sub>2</sub>(η<sup>3</sup>-As<sub>3</sub>)]:

During the synthesis of **7** also minor amounts of the side product [Cp'Mo(CO)<sub>2</sub>(η<sup>3</sup>-As<sub>3</sub>)] could be received. [Cp'Mo(CO)<sub>2</sub>(η<sup>3</sup>-As<sub>3</sub>)] is already known in the literature,<sup>[27]</sup> however, it is not crystallographically characterised yet. By cooling a saturated CH<sub>2</sub>Cl<sub>2</sub> solution of [Cp'Mo(CO)<sub>2</sub>(η<sup>3</sup>-As<sub>3</sub>)] from room temperature to -30 °C yellow crystalline plates can be obtained, which are suitable for single crystal X-ray diffraction. [Cp'Mo(CO)<sub>2</sub>(η<sup>3</sup>-As<sub>3</sub>)] crystallizes in the orthorhombic space group *Fdd2* with one molecule in the asymmetric unit. The refinement of the crystal structure could be done without any difficulty (Figure 34). The *tert*-butyl group of the Cp' ligand shows a rotational disorder in a ratio of 74:26. Crystallographic details for [Cp'Mo(CO)<sub>2</sub>(η<sup>3</sup>-As<sub>3</sub>)] are given in Table S6.

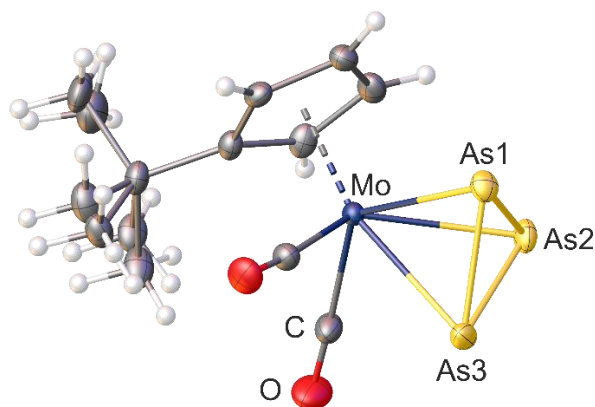

**Figure S34:** X-ray structure of [Cp'Mo(CO)<sub>2</sub>(η<sup>3</sup>-As<sub>3</sub>)]; selected bond lengths [Å]: As1–As2 2.3978(6), As2–As3 2.3588(7), As3–As1 2.3648(6), Mo–As1 2.6519(5), Mo–As2 2.6506(5), Mo–As3 2.7036(5).

**Table S6:** Crystallographic details for [Cp'Mo(CO)<sub>2</sub>(η<sup>3</sup>-As<sub>3</sub>)].

|                                                |                                                                  |                                                            |                      |
|------------------------------------------------|------------------------------------------------------------------|------------------------------------------------------------|----------------------|
| formula                                        | C <sub>11</sub> H <sub>13</sub> As <sub>3</sub> MoO <sub>2</sub> | crystal size [mm <sup>3</sup> ]                            | 0.47 x 0.192 x 0.049 |
| weight [g·mol <sup>-1</sup> ]                  | 497.91                                                           | diffractometer                                             | SuperNova            |
| Temperature [K]                                | 123.0                                                            | absorption correction                                      | gaussian             |
| crystal system                                 | orthorhombic                                                     | <i>T</i> <sub>min</sub> / <i>T</i> <sub>max</sub>          | 0.054 / 1.000        |
| space group                                    | <i>Fdd2</i>                                                      | radiation [Å]                                              | Mo-Kα (λ = 0.71073)  |
| <i>a</i> [Å]                                   | 21.6834(3)                                                       | 2θ range [°]                                               | 6.022 to 69.264      |
| <i>b</i> [Å]                                   | 17.3149(2)                                                       | completeness [%]                                           | 0.999                |
| <i>c</i> [Å]                                   | 15.3030(2)                                                       | reflns collected / unique                                  | 42209 / 5974         |
| α [°]                                          | 90                                                               | <i>R</i> <sub>int</sub> / <i>R</i> <sub>sigma</sub>        | 0.0633 / 0.0329      |
| β [°]                                          | 90                                                               | data / restraints / parameters                             | 5974 / 19 / 187      |
| γ [°]                                          | 90                                                               | <i>GOF</i> on <i>F</i> <sup>2</sup>                        | 1.087                |
| Volume [Å <sup>3</sup> ]                       | 5747.5(1)                                                        | <i>R</i> <sub>1</sub> / <i>wR</i> <sub>2</sub> [I ≥ 2σ(I)] | 0.0279 / 0.0639      |
| <i>Z</i>                                       | 16                                                               | <i>R</i> <sub>1</sub> / <i>wR</i> <sub>2</sub> [all data]  | 0.0302 / 0.0659      |
| <i>ρ</i> <sub>calc</sub> [g·cm <sup>-3</sup> ] | 2.302                                                            | max / min Δρ [e·Å <sup>-3</sup> ]                          | 0.69 / -0.64         |
| μ [mm <sup>-1</sup> ]                          | 7.758                                                            | identification code                                        | LD444_Fr1_abs        |
| <i>F</i> (000)                                 | 3776.0                                                           |                                                            |                      |



## Details of DFT Calculations

The geometry of the molecules has been optimized using ORCA,<sup>[18]</sup> version 4.2 at the B3LYP<sup>[19]</sup> level together with the def2-TZVP basis set for all atoms.<sup>[20]</sup> The dispersion effects have been incorporated via the D3 corrections together with the Beke-Johnson damping.<sup>[21]</sup> Additionally, for the complexes **6a-d**, the solvent effects has been incorporated via the Conductor-like Polarizable Continuum Model (C-PCM)<sup>[22]</sup> with THF as solvent. The calculation of the Wiberg bond indices in the Löwdin orthogonal orbital basis,<sup>[23]</sup> which are known to be less basis set dependent have been calculated using the Multiwfn program (version 3.8)<sup>[24]</sup> It has to be noted that the WBIs computed using the Löwdin orbitals, are slightly overestimated for polar bonds.<sup>[24]</sup> The Intrinsic Bonding Orbitals<sup>[25]</sup> have been generated using the IboWiew program.<sup>[26]</sup>

**Table S7:** Total energies calculated at the B3LYP-D3J/def2-TZVP level and additional C-PCM correction for **6a-d**.

| Compound                                      | Total Energy (a.u.) |
|-----------------------------------------------|---------------------|
| <b>1</b>                                      | -3554.101344105     |
| <b>2</b>                                      | -1558.568042740     |
| [[CpMo(CO) <sub>2</sub> ] <sub>2</sub> (PBi)] | -1532.946515369     |
| <b>3a</b>                                     | -3453.050397049     |
| <b>4</b>                                      | -3427.430176249     |
| <b>5</b>                                      | -1431.904231562     |
| <b>6a</b>                                     | -2136.881020368     |
| <b>6b</b>                                     | -4031.346794109     |
| <b>6c</b>                                     | -2035.799910774     |
| <b>6d</b>                                     | -2010.160724327     |

**Table S8:** Selected bond lengths (Å) and the corresponding Wiberg bond order in Löwdin orthogonalized basis.

| Compound                                      | E-E' bond length (Å) | WBI   | Mo-Mo bond length (Å) | WBI  |
|-----------------------------------------------|----------------------|-------|-----------------------|------|
| <b>1</b>                                      | 2.209                | 1.48  | 3.048                 | 0.53 |
| <b>2</b>                                      | 2.412                | 1.41  | 3.073                 | 0.52 |
| [[CpMo(CO) <sub>2</sub> ] <sub>2</sub> (PBi)] | 2.504                | 1.35  | 3.080                 | 0.51 |
| <b>3a</b>                                     | 2.515                | 1.40  | 3.095                 | 0.51 |
| <b>4</b>                                      | 2.600                | 1.35  | 3.102                 | 0.51 |
| <b>5</b>                                      | 2.772                | 1.36  | 3.138                 | 0.50 |
| <b>6a</b>                                     | n. a.                | n. a. | 3.199                 | 0.45 |
| <b>6b</b>                                     | n. a.                | n. a. | 3.231                 | 0.44 |
| <b>6c</b>                                     | n. a.                | n. a. | 3.305                 | 0.43 |
| <b>6d</b>                                     | n. a.                | n. a. | 3.320                 | 0.42 |

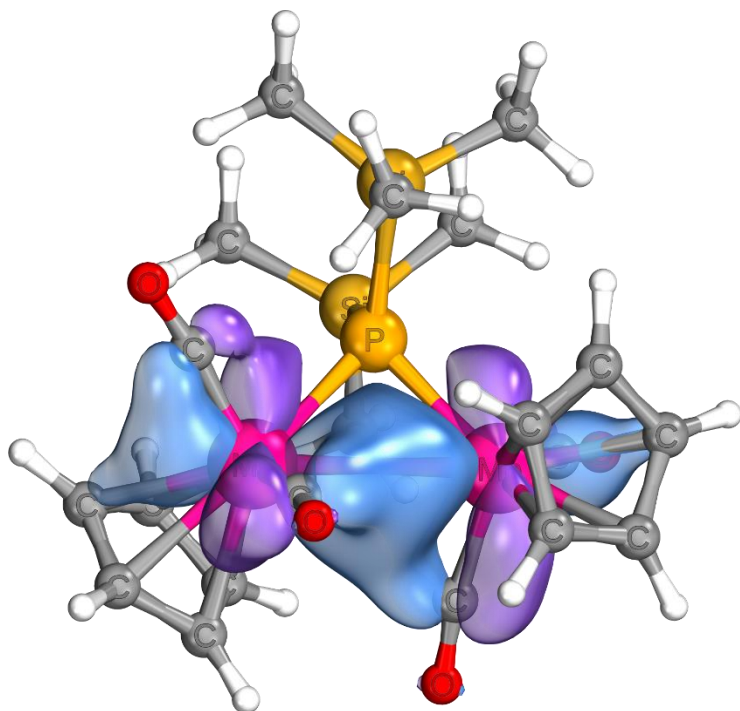

**Figure S35:** Intrinsic Bonding Orbital representing the Mo-Mo bond in **6a**. AO contributions: Mo2 0.763, Mo1 0.763, C9 0.136, C13 0.136, C12 0.052, C8 0.052 (other: 0.098).

**Table S9:** Cartesian coordinates of the optimized geometry of  $[(\text{CpMo}(\text{CO})_2)_2(\text{PAs})]$  (**1**).

|    |              |              |              |
|----|--------------|--------------|--------------|
| As | -0.619448173 | -2.484514211 | -0.859089129 |
| P  | -1.765412690 | -1.657004630 | 0.838565293  |
| Mo | 0.779481442  | -1.152782602 | 0.869319661  |
| Mo | -1.384649976 | 0.097642499  | -0.875305199 |
| C  | -0.948918290 | 2.105542138  | 0.373157870  |
| H  | -0.115877234 | 2.220854217  | 1.042614638  |
| C  | -3.055385252 | 1.680323644  | -0.430266584 |
| H  | -4.097081094 | 1.410423048  | -0.480791604 |
| C  | -2.258776948 | 2.152645410  | -1.517171517 |
| H  | -2.592929221 | 2.319795180  | -2.527023866 |
| C  | -0.954665166 | 2.407766262  | -1.010776353 |
| H  | -0.122375091 | 2.788826208  | -1.579317602 |
| C  | -2.246959838 | 1.650850912  | 0.731227598  |
| H  | -2.558670350 | 1.348253345  | 1.715645128  |
| C  | -2.766739448 | -0.783199515 | -1.995664350 |
| C  | -0.117981210 | -0.130400853 | -2.376455789 |
| O  | -3.606594419 | -1.206221087 | -2.653284477 |
| O  | 0.605996614  | -0.159802619 | -3.274137103 |
| C  | 2.301319083  | 0.225935207  | -0.378803841 |
| H  | 1.988266329  | 0.997529711  | -1.058524522 |
| C  | 2.990663319  | -1.800099418 | 0.449936066  |
| H  | 3.285104791  | -2.834515623 | 0.512201124  |
| C  | 2.986085799  | -0.864826135 | 1.528407201  |
| H  | 3.292595530  | -1.058915082 | 2.542177457  |
| C  | 2.551798216  | 0.385445797  | 1.006019319  |
| H  | 2.457157504  | 1.301662760  | 1.565227522  |
| C  | 2.567106552  | -1.127443460 | -0.722262565 |
| H  | 2.475840172  | -1.555956070 | -1.705075649 |

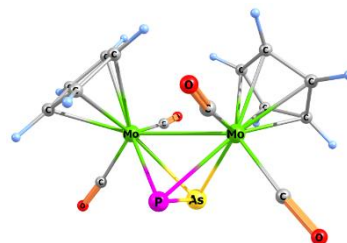

|   |              |              |             |
|---|--------------|--------------|-------------|
| C | 0.689286564  | -2.794136830 | 1.983350384 |
| C | -0.045299462 | -0.176654705 | 2.375092027 |
| O | 0.726440315  | -3.735568907 | 2.637279230 |
| O | -0.439378364 | 0.428543408  | 3.273730634 |

**Table S10:** Cartesian coordinates of the optimized geometry of  $[(\text{CpMo}(\text{CO})_2)_2(\text{PSb})]$  (**2**).

|    |              |              |              |
|----|--------------|--------------|--------------|
| Sb | -0.661486242 | -2.690099957 | -0.951297907 |
| P  | -1.787107348 | -1.614468545 | 0.891215896  |
| Mo | 0.785204403  | -1.170398080 | 0.871804175  |
| Mo | -1.399650513 | 0.088817255  | -0.885169074 |
| C  | -0.927632734 | 2.090918918  | 0.363016608  |
| H  | -0.088391613 | 2.195172491  | 1.026376827  |
| C  | -3.044885034 | 1.692443672  | -0.424658445 |
| H  | -4.090120213 | 1.435193535  | -0.467184900 |
| C  | -2.250998726 | 2.156299021  | -1.516770606 |
| H  | -2.590612778 | 2.327061230  | -2.524214427 |
| C  | -0.940077128 | 2.393221963  | -1.021016012 |
| H  | -0.107693038 | 2.764053115  | -1.596170696 |
| C  | -2.227843614 | 1.652941411  | 0.730575732  |
| H  | -2.536131793 | 1.353246189  | 1.716955111  |
| C  | -2.802579224 | -0.755964584 | -1.999604063 |
| C  | -0.134442042 | -0.134645108 | -2.387637037 |
| O  | -3.665378701 | -1.137227193 | -2.656810603 |
| O  | 0.593369822  | -0.131500790 | -3.285175853 |
| C  | 2.284789039  | 0.233870299  | -0.374844268 |
| H  | 1.962967350  | 0.995843131  | -1.061128764 |
| C  | 3.007623758  | -1.774785465 | 0.469307528  |
| H  | 3.323794421  | -2.802317014 | 0.538601845  |
| C  | 2.978592789  | -0.834868225 | 1.541880595  |
| H  | 3.282751377  | -1.017524565 | 2.558476473  |
| C  | 2.522927257  | 0.404117521  | 1.009941127  |
| H  | 2.408217123  | 1.321089551  | 1.564181042  |
| C  | 2.578501755  | -1.115755365 | -0.710287212 |
| H  | 2.513949872  | -1.545914969 | -1.694390052 |
| C  | 0.708989346  | -2.816926265 | 1.974125465  |
| C  | -0.038873374 | -0.202631242 | 2.382664893  |
| O  | 0.763021158  | -3.758675202 | 2.628274465  |
| O  | -0.420795457 | 0.399413064  | 3.288962237  |

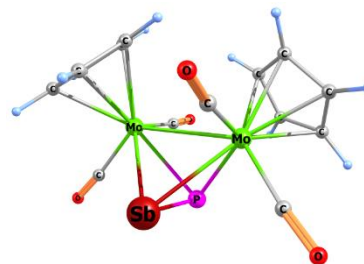

**Table S11:** Cartesian coordinates of the optimized geometry of  $[(\text{CpMo}(\text{CO})_2)_2(\text{PBi})]$ .

|    |              |              |              |
|----|--------------|--------------|--------------|
| Bi | -0.675044218 | -2.783171593 | -0.996347412 |
| P  | -1.788910107 | -1.595617908 | 0.905495401  |
| Mo | 0.785074061  | -1.175563511 | 0.873346569  |
| Mo | -1.402907712 | 0.086724193  | -0.888650558 |
| C  | -0.917953559 | 2.083713866  | 0.361567153  |
| H  | -0.078182633 | 2.180588169  | 1.025231236  |
| C  | -3.036808098 | 1.698928731  | -0.428221600 |
| H  | -4.083378479 | 1.447362239  | -0.471622851 |
| C  | -2.239989974 | 2.159549414  | -1.519178773 |
| H  | -2.577795776 | 2.332255762  | -2.526843588 |
| C  | -0.927873192 | 2.387373266  | -1.022388416 |
| H  | -0.092876895 | 2.753028944  | -1.597056828 |

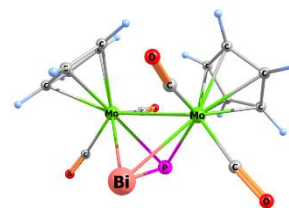

|   |              |              |              |
|---|--------------|--------------|--------------|
| C | -2.220782287 | 1.653473992  | 0.727779185  |
| H | -2.531613778 | 1.354455016  | 1.713547615  |
| C | -2.816760147 | -0.750304952 | -1.992486627 |
| C | -0.140259308 | -0.136928692 | -2.393893618 |
| O | -3.691291458 | -1.118935727 | -2.643298629 |
| O | 0.591120178  | -0.120990912 | -3.289564727 |
| C | 2.274079689  | 0.239386725  | -0.373676111 |
| H | 1.948438536  | 0.996381288  | -1.063459267 |
| C | 3.012301078  | -1.760039178 | 0.479669306  |
| H | 3.337997323  | -2.784287859 | 0.553273090  |
| C | 2.970850619  | -0.817857335 | 1.549255241  |
| H | 3.272810330  | -0.994943273 | 2.567427298  |
| C | 2.505333701  | 0.415292493  | 1.011733123  |
| H | 2.380144483  | 1.332544836  | 1.563202394  |
| C | 2.581918330  | -1.108080517 | -0.703990794 |
| H | 2.528055517  | -1.540006183 | -1.687896206 |
| C | 0.712696021  | -2.828220855 | 1.964466076  |
| C | -0.036651272 | -0.217689006 | 2.389482743  |
| O | 0.772977895  | -3.772797502 | 2.615279625  |
| O | -0.414718368 | 0.384376069  | 3.297819552  |

**Table S12:** Cartesian coordinates of the optimized geometry of  $[(\text{CpMo}(\text{CO})_2)_2(\text{AsSb})]$  (**3a**).

|    |              |              |              |
|----|--------------|--------------|--------------|
| Sb | -0.621511743 | -2.686393251 | -0.987272421 |
| As | -1.882932640 | -1.697473478 | 0.950648591  |
| Mo | 0.787851894  | -1.178969691 | 0.882115728  |
| Mo | -1.410789010 | 0.088554978  | -0.888633901 |
| C  | -0.922002562 | 2.078541311  | 0.369196833  |
| H  | -0.090344104 | 2.171482184  | 1.043331842  |
| C  | -3.035226867 | 1.711571960  | -0.446059333 |
| H  | -4.083821894 | 1.470955199  | -0.501391564 |
| C  | -2.221803109 | 2.163286860  | -1.528035621 |
| H  | -2.546467737 | 2.340714555  | -2.539140094 |
| C  | -0.912845735 | 2.379899607  | -1.015099639 |
| H  | -0.068652523 | 2.740093553  | -1.579608775 |
| C  | -2.232845280 | 1.659389966  | 0.720491832  |
| H  | -2.558719592 | 1.371053947  | 1.704586167  |
| C  | -2.824100719 | -0.755204301 | -1.989711602 |
| C  | -0.156064195 | -0.132709203 | -2.397377959 |
| O  | -3.694286906 | -1.134674357 | -2.638231630 |
| O  | 0.569619117  | -0.120833285 | -3.297027582 |
| C  | 2.267610144  | 0.237368331  | -0.373237656 |
| H  | 1.936526900  | 0.996055307  | -1.058510516 |
| C  | 3.010731476  | -1.764691151 | 0.469089827  |
| H  | 3.334861337  | -2.789774088 | 0.537440538  |
| C  | 2.978262949  | -0.824872690 | 1.541525893  |
| H  | 3.286899042  | -1.005000726 | 2.557142993  |
| C  | 2.509568959  | 0.410004761  | 1.011013496  |
| H  | 2.388767119  | 1.325890214  | 1.565699285  |
| C  | 2.571481870  | -1.109660062 | -0.709404018 |
| H  | 2.508951603  | -1.540181995 | -1.693421694 |
| C  | 0.737136667  | -2.829626263 | 1.978509513  |
| C  | -0.036567966 | -0.209489906 | 2.391808779  |
| O  | 0.815256482  | -3.775188362 | 2.625907336  |
| O  | -0.404543176 | 0.409879677  | 3.293655452  |

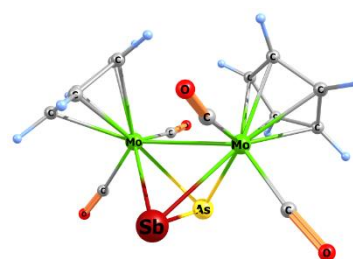

**Table S13:** Cartesian coordinates of the optimized geometry of  $[(\text{CpMo}(\text{CO})_2)_2(\text{AsBi})]$  (**4**).

|    |              |              |              |
|----|--------------|--------------|--------------|
| Bi | -0.637790539 | -2.778159050 | -1.029057149 |
| As | -1.886491304 | -1.674702313 | 0.967345041  |
| Mo | 0.787888208  | -1.183504176 | 0.884180177  |
| Mo | -1.414477929 | 0.087286021  | -0.892549322 |
| C  | -0.915153003 | 2.073771547  | 0.366762926  |
| H  | -0.082151750 | 2.162012094  | 1.039800811  |
| C  | -3.030875787 | 1.716073891  | -0.445944656 |
| H  | -4.080400833 | 1.479305006  | -0.499964287 |
| C  | -2.217381395 | 2.165803910  | -1.528458851 |
| H  | -2.542661940 | 2.344706690  | -2.539092569 |
| C  | -0.906798038 | 2.376075708  | -1.017420444 |
| H  | -0.061924699 | 2.732877419  | -1.583063682 |
| C  | -2.227007523 | 1.659798834  | 0.719519297  |
| H  | -2.552936957 | 1.372629656  | 1.703932313  |
| C  | -2.834159863 | -0.747209542 | -1.990009928 |
| C  | -0.157989411 | -0.135683900 | -2.400521466 |
| O  | -3.712780155 | -1.112795420 | -2.637173124 |
| O  | 0.568743150  | -0.112101762 | -3.300360958 |
| C  | 2.259900070  | 0.240488992  | -0.372711262 |
| H  | 1.926594784  | 0.995152339  | -1.061188227 |
| C  | 3.014728394  | -1.754133616 | 0.477471688  |
| H  | 3.346878566  | -2.776393522 | 0.549562054  |
| C  | 2.972592315  | -0.812160035 | 1.547145031  |
| H  | 3.279886450  | -0.987358478 | 2.564000188  |
| C  | 2.496095181  | 0.417889551  | 1.011871006  |
| H  | 2.367774314  | 1.334345129  | 1.563882808  |
| C  | 2.574543055  | -1.104950749 | -0.704555480 |
| H  | 2.521272117  | -1.536592584 | -1.688562203 |
| C  | 0.739666978  | -2.837882992 | 1.972738693  |
| C  | -0.029866401 | -0.219501507 | 2.398850097  |
| O  | 0.824105595  | -3.784601898 | 2.618958968  |
| O  | -0.389821850 | 0.399514358  | 3.304612610  |

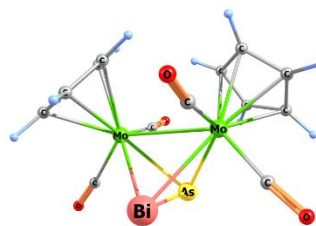

**Table S14:** Cartesian coordinates of the optimized geometry of  $[(\text{CpMo}(\text{CO})_2)_2(\text{SbBi})]$  (**5**).

|    |              |             |             |
|----|--------------|-------------|-------------|
| Bi | 0.570368021  | 6.150784767 | 7.829125897 |
| Sb | 1.397801809  | 6.038588560 | 5.186141550 |
| Mo | -0.472497009 | 4.092782531 | 5.922350761 |
| Mo | 2.446345042  | 4.093750995 | 7.074374521 |
| O  | -1.475366939 | 3.256647878 | 8.758436831 |
| O  | -2.696976196 | 6.275887649 | 5.710745033 |
| C  | -1.064794733 | 3.654579213 | 7.752022495 |
| C  | -1.835274458 | 5.523485399 | 5.841532526 |
| O  | 3.463679708  | 3.248116889 | 4.248683681 |
| O  | 4.664998399  | 6.284980646 | 7.263036423 |
| C  | 3.049401888  | 3.645439341 | 5.252990329 |
| C  | 3.806059371  | 5.528200056 | 7.143706248 |
| C  | 1.688831822  | 2.124214318 | 8.225505394 |
| H  | 0.747158214  | 1.641475905 | 8.039398880 |
| C  | 2.912593270  | 1.851002721 | 7.567855107 |
| H  | 3.063904232  | 1.123949583 | 6.787063223 |
| C  | 3.923421632  | 2.672252912 | 8.141841350 |
| H  | 4.968808758  | 2.668437097 | 7.884388801 |
| C  | 3.304829742  | 3.465942004 | 9.151772073 |
| H  | 3.801949939  | 4.182275717 | 9.784487242 |
| C  | 1.927886561  | 3.127952380 | 9.201801796 |
| H  | 1.196730770  | 3.526735457 | 9.882839341 |
| C  | 0.280000974  | 2.114816866 | 4.783297426 |
| H  | 1.218766988  | 1.629486993 | 4.977585591 |
| C  | -0.948649707 | 1.849528697 | 5.435241571 |
| H  | -1.107404814 | 1.126833321 | 6.218631606 |
| C  | -1.952027579 | 2.673378665 | 4.852763175 |
| H  | -2.998623801 | 2.676389524 | 5.105313412 |
| C  | -1.324171831 | 3.460505302 | 3.843061392 |
| H  | -1.813721283 | 4.177880995 | 3.205670060 |
| C  | 0.050958579  | 3.116000796 | 3.801994531 |
| H  | 0.787612633  | 3.511896825 | 3.125141734 |

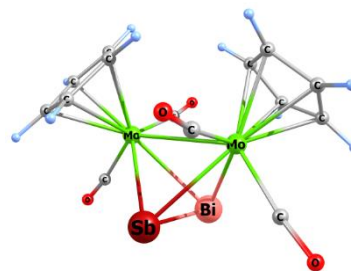

**Table S15:** Cartesian coordinates of the optimized geometry of  $[(\text{CpMo}(\text{CO})_2)_2\text{P}(\text{SiMe}_3)_2]^-$  (**6a**).

|    |              |              |              |
|----|--------------|--------------|--------------|
| Mo | 1.421806855  | -1.847380882 | 0.663419393  |
| Mo | -1.421951642 | -1.847188120 | -0.663605785 |
| P  | 0.000011820  | 0.032252906  | -0.000016799 |
| Si | 0.617011103  | 1.469304391  | -1.690479471 |
| Si | -0.616819772 | 1.469241777  | 1.690571352  |
| O  | 2.463234293  | -2.893585023 | -2.023854882 |
| O  | 3.700952159  | 0.120059569  | 0.029107539  |
| C  | 2.775880836  | -0.577390138 | 0.245010739  |
| C  | 1.960349955  | -2.447902944 | -1.048503593 |
| O  | -2.463492698 | -2.893430245 | 2.023612632  |
| O  | -3.700847188 | 0.120546011  | -0.029281974 |
| C  | -2.775876660 | -0.577033243 | -0.245189423 |
| C  | -1.960567409 | -2.447741965 | 1.048283899  |
| C  | 2.000270601  | -3.923912925 | 1.525611493  |
| H  | 2.175337180  | -4.764194156 | 0.861826945  |
| C  | 0.773076351  | -3.603960077 | 2.161321660  |
| H  | -0.154238247 | -4.153943437 | 2.071046254  |
| C  | 2.968165767  | -2.955754465 | 1.917554206  |
| H  | 4.010574960  | -2.937265241 | 1.617693571  |
| C  | 0.966921221  | -2.431381157 | 2.944682001  |
| H  | 0.216790063  | -1.958644775 | 3.564815949  |
| C  | 2.320367725  | -2.027478378 | 2.792924567  |
| H  | 2.795547245  | -1.180864600 | 3.277255019  |
| C  | -1.669778654 | 0.639879139  | 3.023775240  |
| H  | -2.638141810 | 0.311786852  | 2.638673489  |
| H  | -1.847496194 | 1.379785417  | 3.817251565  |
| H  | -1.175876271 | -0.224468038 | 3.472137578  |
| C  | -1.636556902 | 2.978218911  | 1.141645442  |
| H  | -1.114776108 | 3.628880875  | 0.433931935  |
| H  | -1.873421163 | 3.578169051  | 2.032341262  |
| H  | -2.582556444 | 2.662493225  | 0.690638305  |
| C  | 0.934532895  | 2.120306162  | 2.571942191  |
| H  | 1.477603169  | 1.298173334  | 3.049845039  |
| H  | 0.637998581  | 2.833977019  | 3.354031468  |
| H  | 1.629398506  | 2.627369152  | 1.895856562  |
| C  | -2.000831889 | -3.923558297 | -1.525927068 |
| H  | -2.176209169 | -4.763801470 | -0.862176847 |
| C  | -0.773460515 | -3.603892126 | -2.161436886 |
| H  | 0.153703409  | -4.154110002 | -2.071035305 |
| C  | -2.968420058 | -2.955147886 | -1.917989643 |
| H  | -4.010869195 | -2.936403346 | -1.618282563 |
| C  | -0.966894349 | -2.431244777 | -2.944803967 |
| H  | -0.216541835 | -1.958687116 | -3.564805957 |
| C  | -2.320262868 | -2.027018361 | -2.793253697 |
| H  | -2.795156981 | -1.180275567 | -3.277639399 |
| C  | 1.671374573  | 0.640316692  | -3.022805362 |
| H  | 2.639681788  | 0.312880058  | -2.637007129 |
| H  | 1.849157467  | 1.380154509  | -3.816329755 |
| H  | 1.178262364  | -0.224425572 | -3.471299714 |
| C  | 1.635367547  | 2.979057070  | -1.141139831 |
| H  | 1.112628352  | 3.629521481  | -0.433951447 |
| H  | 1.872504902  | 3.578975972  | -2.031783113 |
| H  | 2.581238942  | 2.664044762  | -0.689373509 |
| C  | -0.934183772 | 2.119119625  | -2.573047220 |
| H  | -1.476365787 | 1.296501511  | -3.051129215 |
| H  | -0.637599666 | 2.832811247  | -3.355098873 |
| H  | -1.629857383 | 2.625857612  | -1.897558867 |

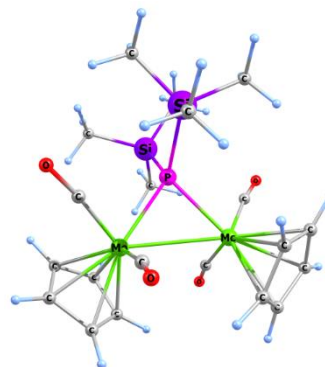

**Table S16:** Cartesian coordinates of the optimized geometry of  $[(\text{CpMo}(\text{CO})_2)_2\text{As}(\text{SiMe}_3)_2]^-$  (**6b**).

|    |              |              |              |
|----|--------------|--------------|--------------|
| Mo | 0.301974320  | 2.024631398  | -1.595205595 |
| Mo | -0.431844853 | 1.991742054  | 1.551624209  |
| As | 0.009704221  | 0.038067008  | -0.024329655 |
| Si | 1.911630152  | -1.314165476 | 0.342014832  |
| Si | -1.784555468 | -1.453501744 | -0.393924802 |
| O  | 2.062018267  | 4.262847268  | -0.369979962 |
| O  | -2.361652846 | 4.087411871  | 0.330382108  |
| O  | 3.096031622  | 0.995029500  | -2.413715943 |
| O  | -3.135974560 | 0.744653072  | 2.369525981  |
| C  | 1.377176074  | 3.383130719  | -0.738411512 |
| C  | 2.036023599  | 1.341766639  | -2.035530500 |
| C  | -2.106800061 | 1.174300674  | 1.991509161  |
| C  | -1.610316803 | 3.262989761  | 0.697264048  |
| C  | -0.312976251 | 1.854651826  | -3.878128363 |
| H  | 0.311210316  | 1.312028145  | -4.569764133 |
| C  | 1.328067209  | 1.420259450  | 3.118277544  |
| H  | 1.746974055  | 0.430437276  | 3.172847351  |
| C  | -1.411083083 | 1.320661750  | -3.158986988 |
| H  | -1.754980390 | 0.302361046  | -3.212018607 |
| C  | -0.030972121 | 3.234510298  | 3.502472146  |
| H  | -0.802647424 | 3.868214479  | 3.907930013  |
| C  | -0.191484358 | 3.230581654  | -3.547091674 |
| H  | 0.530685691  | 3.919382453  | -3.953896676 |
| C  | 0.962887762  | 3.616282433  | 2.557151373  |
| H  | 1.072956666  | 4.587901495  | 2.106361560  |
| C  | -1.210713826 | 3.538660024  | -2.601837014 |
| H  | -1.392478064 | 4.500120886  | -2.152363293 |
| C  | -1.965162680 | 2.358852109  | -2.365866793 |
| H  | -2.802229891 | 2.269072809  | -1.696724360 |
| C  | -2.101372606 | -2.437190819 | 1.178329942  |
| H  | -1.239854073 | -3.043928714 | 1.457608430  |
| H  | -2.954490111 | -3.105737313 | 1.026090112  |
| H  | -2.334587733 | -1.767507089 | 2.006794927  |
| C  | 2.301750350  | -2.266049441 | -1.233499661 |
| H  | 1.492360694  | -2.941908940 | -1.510183018 |
| H  | 3.208009853  | -2.861779908 | -1.086106114 |
| H  | 2.475000528  | -1.578534575 | -2.062121578 |
| C  | 0.192527106  | 1.872059589  | 3.835678061  |
| H  | -0.390199796 | 1.285310800  | 4.527469749  |
| C  | -3.350128942 | -0.502177686 | -0.821097483 |
| H  | -3.453701458 | 0.392590940  | -0.210561451 |
| H  | -4.211867444 | -1.148465105 | -0.628812790 |
| H  | -3.377779053 | -0.211879857 | -1.870617402 |
| C  | 1.803140511  | 2.495408490  | 2.323078189  |
| H  | 2.644813371  | 2.467254693  | 1.654234289  |
| C  | 1.627767286  | -2.541741426 | 1.742967264  |
| H  | 1.235933566  | -2.046199807 | 2.633462646  |
| H  | 2.573653074  | -3.024004014 | 2.007724385  |
| H  | 0.922813494  | -3.322333525 | 1.452804451  |
| C  | -1.409496586 | -2.651600485 | -1.798927807 |
| H  | -1.050644542 | -2.125515512 | -2.685771866 |
| H  | -2.317870316 | -3.198574812 | -2.069230099 |
| H  | -0.652092444 | -3.381603979 | -1.509158553 |
| C  | 3.400811132  | -0.249620365 | 0.773461616  |
| H  | 3.443978729  | 0.647171286  | 0.158642902  |
| H  | 4.308115737  | -0.833189459 | 0.590180018  |
| H  | 3.400342401  | 0.047166159  | 1.821476384  |

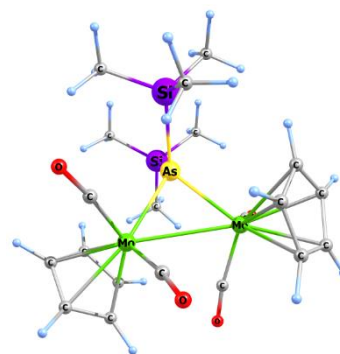



**Table S17:** Cartesian coordinates of the optimized geometry of  $[(\text{CpMo}(\text{CO})_2)_2\text{Sb}(\text{SiMe}_3)_2]^-$  (**6c**).

|    |              |              |              |
|----|--------------|--------------|--------------|
| Sb | 0.022750682  | -0.045185096 | 0.051254708  |
| Mo | -1.437555806 | 1.777884551  | 1.396953355  |
| Mo | 0.385750420  | -0.679629566 | 2.645426641  |
| Si | 2.008039687  | 0.796494643  | -1.336130307 |
| Si | -1.155691859 | -1.752417518 | -1.455258683 |
| O  | -2.264210944 | -0.725638845 | 4.259964501  |
| O  | 0.096536543  | 3.034723885  | 3.783599254  |
| O  | 0.138268341  | 3.950087564  | -0.138261640 |
| O  | -0.562570489 | -3.533415842 | 1.925363116  |
| C  | -0.414262142 | 3.082093353  | 0.436640817  |
| C  | 1.665922475  | 0.316639918  | 4.364947747  |
| H  | 1.197785962  | 0.972657423  | 5.078881346  |
| C  | 2.283398230  | 0.719434126  | 3.152028372  |
| H  | 2.347977845  | 1.727083114  | 2.779783799  |
| C  | -0.424814667 | 2.481817221  | 2.889132927  |
| C  | 1.786200390  | -1.099265884 | 4.474320085  |
| H  | 1.445860481  | -1.706360508 | 5.297085785  |
| C  | -1.305628409 | -0.647240520 | 3.587141945  |
| C  | 2.787813473  | -0.443269761 | 2.510551190  |
| H  | 3.317037561  | -0.476997227 | 1.573620802  |
| C  | 2.472631858  | -1.563688604 | 3.320108718  |
| H  | 2.725361800  | -2.589056155 | 3.103153440  |
| C  | 3.049707439  | 1.964525562  | -0.294202994 |
| H  | 2.427039614  | 2.735171366  | 0.159656424  |
| H  | 3.790036100  | 2.453906294  | -0.934924632 |
| H  | 3.583919296  | 1.440641887  | 0.497989421  |
| C  | -3.494119014 | 1.175515477  | 0.277333613  |
| H  | -3.505307609 | 0.647845889  | -0.660979473 |
| C  | -1.577727026 | -0.986406201 | -3.123240609 |
| H  | -2.174366991 | -0.079787316 | -3.002359195 |
| H  | -2.150428118 | -1.695260991 | -3.729195599 |
| H  | -0.673267871 | -0.723440032 | -3.675200857 |
| C  | -3.459494023 | 2.881475861  | 1.819277073  |
| H  | -3.464611334 | 3.866215270  | 2.256962045  |
| C  | -0.231344369 | -2.424830297 | 2.150180222  |
| C  | -2.727873729 | -2.346450836 | -0.613049878 |
| H  | -2.517464749 | -2.685755643 | 0.401058598  |
| H  | -3.143689863 | -3.186693728 | -1.178043530 |
| H  | -3.485610788 | -1.564858452 | -0.565217314 |
| C  | -3.511288334 | 1.644569855  | 2.525444544  |
| H  | -3.538730636 | 1.522966274  | 3.594900120  |
| C  | -3.439902822 | 2.583973317  | 0.430177482  |
| H  | -3.405412057 | 3.304093059  | -0.371417990 |
| C  | -3.531054046 | 0.593010857  | 1.572385570  |
| H  | -3.558386057 | -0.459942917 | 1.793329885  |
| C  | 1.340609850  | 1.739473691  | -2.821846578 |
| H  | 0.717774817  | 1.104133070  | -3.453522520 |
| H  | 2.168378906  | 2.118995224  | -3.429209307 |
| H  | 0.740184690  | 2.588442143  | -2.490571656 |
| C  | -0.005924744 | -3.220914168 | -1.707188584 |
| H  | 0.931476319  | -2.919570415 | -2.177495312 |
| H  | -0.484332676 | -3.969000347 | -2.347138807 |
| H  | 0.225762092  | -3.686684945 | -0.747811954 |
| C  | 3.067112975  | -0.644374738 | -1.927648193 |
| H  | 3.407435847  | -1.255847178 | -1.089299847 |
| H  | 3.948118705  | -0.270337160 | -2.458377583 |
| H  | 2.509678776  | -1.288550007 | -2.610360507 |

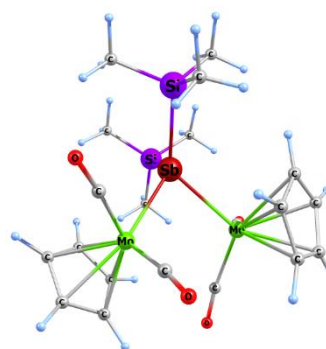

**Table S18:** Cartesian coordinates of the optimized geometry of  $[(\text{CpMo}(\text{CO})_2)_2\text{Bi}(\text{SiMe}_3)_2]^-$  (**6d**).

|    |              |              |              |
|----|--------------|--------------|--------------|
| Bi | 0.024139401  | -0.048531959 | 0.058948552  |
| Mo | -1.454846698 | 1.816407404  | 1.478397505  |
| Mo | 0.357966413  | -0.661387172 | 2.741324985  |
| Si | 2.070276663  | 0.824132096  | -1.365153764 |
| Si | -1.194143012 | -1.814546710 | -1.480836423 |
| O  | -2.288481455 | -0.667876638 | 4.360106297  |
| O  | 0.061204025  | 3.052442340  | 3.886015577  |
| O  | 0.152402871  | 3.981281732  | -0.037346067 |
| O  | -0.624346528 | -3.506435202 | 2.026709274  |
| C  | -0.415675536 | 3.117914013  | 0.530549050  |
| C  | 1.634759037  | 0.335588209  | 4.457964055  |
| H  | 1.164922857  | 0.989971370  | 5.172222897  |
| C  | 2.253392093  | 0.741095618  | 3.246642493  |
| H  | 2.317239122  | 1.749244415  | 2.875138225  |
| C  | -0.452348320 | 2.507111569  | 2.981779618  |
| C  | 1.754560231  | -1.081001222 | 4.564779155  |
| H  | 1.416496016  | -1.689093522 | 5.387654064  |
| C  | -1.330679685 | -0.605851603 | 3.683786220  |
| C  | 2.759630271  | -0.420408492 | 2.603834822  |
| H  | 3.291244787  | -0.450463179 | 1.667969049  |
| C  | 2.444209151  | -1.542903685 | 3.410617593  |
| H  | 2.699182421  | -2.567508409 | 3.192767160  |
| C  | 3.103127992  | 1.974476700  | -0.296287232 |
| H  | 2.478826895  | 2.756104829  | 0.137292317  |
| H  | 3.873470223  | 2.450060899  | -0.911824204 |
| H  | 3.600110062  | 1.440493989  | 0.513694958  |
| C  | -3.504818142 | 1.195255333  | 0.357022184  |
| H  | -3.513709913 | 0.656075560  | -0.574876393 |
| C  | -1.604773077 | -1.049574327 | -3.151391548 |
| H  | -2.229310468 | -0.161448296 | -3.034849434 |
| H  | -2.144683226 | -1.768931048 | -3.775141865 |
| H  | -0.696254087 | -0.756466991 | -3.681268674 |
| C  | -3.473453632 | 2.919035073  | 1.880139550  |
| H  | -3.483355413 | 3.908526230  | 2.306683511  |
| C  | -0.277655146 | -2.401993265 | 2.251771504  |
| C  | -2.764384278 | -2.384437991 | -0.620061838 |
| H  | -2.539058762 | -2.748730902 | 0.382569488  |
| H  | -3.217830805 | -3.201319265 | -1.190614939 |
| H  | -3.496972870 | -1.581505327 | -0.538298166 |
| C  | -3.528067606 | 1.689410182  | 2.599817088  |
| H  | -3.557821065 | 1.579272880  | 3.670397037  |
| C  | -3.451145861 | 2.605487325  | 0.493698695  |
| H  | -3.416059745 | 3.316420426  | -0.315982502 |
| C  | -3.545061512 | 0.627195939  | 1.658661482  |
| H  | -3.571220403 | -0.423437565 | 1.890974365  |
| C  | 1.393370199  | 1.782021503  | -2.836518368 |
| H  | 0.768096061  | 1.150606090  | -3.470271772 |
| H  | 2.216197886  | 2.169534859  | -3.445869213 |
| H  | 0.792479147  | 2.626254420  | -2.493728896 |
| C  | -0.040953136 | -3.283089348 | -1.713801086 |
| H  | 0.896581666  | -2.983014291 | -2.185322509 |
| H  | -0.514570795 | -4.040700517 | -2.346328063 |
| H  | 0.191121188  | -3.737162452 | -0.748744297 |
| C  | 3.116150269  | -0.620612019 | -1.968804157 |
| H  | 3.479214990  | -1.221359876 | -1.132338274 |
| H  | 3.982533528  | -0.252103693 | -2.527148597 |
| H  | 2.540516713  | -1.272955591 | -2.628537516 |

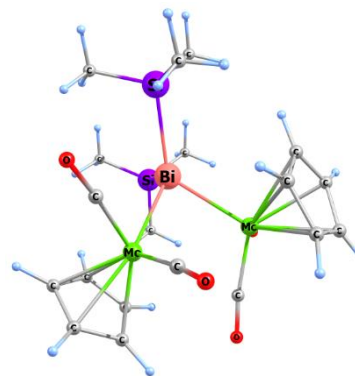

## References

- [1] R. J. Klingler, W. Butler, M. D. Curtis, *J. Am. Chem. Soc.* **1975**, *97*, 3535-3536.
- [2] M. Scheer, K. Schuster, K. Schenzel, E. Herrmann, P. G. Jones, *Z. Anorg. Allg. Chem.* **1991**, *600*, 109-119.
- [3] G. Fritz, W. Hölderich, *Z. Anorg. Allg. Chem.* **1976**, *422*, 104-114.
- [4] a) R. L. Wells, M. F. Self, J. D. Johansen, J. A. Laske, S. R. Aubuchon, L. J. Jones III, A. H. Cowley, S. Kamepalli, in *Inorg. Synth.*, **1996**, pp. 150-158; b) G. Becker, C. Witthauer, *Z. Anorg. Allg. Chem.* **1982**, *492*, 28-36.
- [5] a) G. Becker, A. Münch, C. Witthauer, *Z. Anorg. Allg. Chem.* **1982**, *492*, 15-27; b) E. Amberger, R. W. Salazar G, *J. Organomet. Chem.* **1967**, *8*, 111-114; c) C. Marquardt, O. Hegen, M. Hautmann, G. Balázs, M. Bodensteiner, A. V. Virovets, A. Y. Timoshkin, M. Scheer, *Angew. Chem. Int. Ed.* **2015**, *54*, 13122-13125.
- [6] a) O. Mundt, G. Becker, M. Rössler, C. Witthauer, *Z. Anorg. Allg. Chem.* **1983**, *506*, 42-58; b) T. M. Rookes, E. P. Wildman, G. Balázs, B. M. Gardner, A. J. Wooles, M. Gregson, F. Tuna, M. Scheer, S. T. Liddle, *Angew. Chem. Int. Ed.* **2018**, *57*, 1332-1336; c) G. Becker, M. Roessler, *Z. Naturforsch. B.* **1982**, *37b*, 91-96.
- [7] A. Johannis, *Ann. Chim. Phys.* **1906**, *7*, 106.
- [8] O. J. Scherer, H. Sitzmann, G. Wolmershäuser, *J. Organomet. Chem.* **1984**, *268*, C9-C12.
- [9] M. L. Ziegler, K. Blechschmitt, B. Nuber, T. Zahn, *Chem. Ber.* **1988**, *121*, 159-171.
- [10] J. R. Harper, A. L. Rheingold, *J. Organomet. Chem.* **1990**, *390*, c36-c38.
- [11] W. Clegg, N. A. Compton, R. J. Errington, G. A. Fisher, N. C. Norman, T. B. Marder, *J. Chem. Soc., Dalton Trans.* **1991**, 2887-2895.
- [12] J. E. Davies, L. C. Kerr, M. J. Mays, P. R. Raithby, P. K. Tompkin, A. D. Woods, *Angew. Chem. Int. Ed.* **1998**, *37*, 1428-1429.
- [13] Agilent (2014). CrysAlis PRO. Agilent Technologies Ltd., Yarnton, Oxfordshire, England.
- [14] G. Sheldrick, *Acta Crystallographica Section A* **2015**, *71*, 3-8.
- [15] O. V. Dolomanov, L. J. Bourhis, R. J. Gildea, J. A. K. Howard, H. Puschmann, *J. Appl. Cryst.* **2009**, *42*, 339-341.
- [16] G. Sheldrick, *Acta Crystallographica Section C* **2015**, *71*, 3-8.
- [17] Crystallographic Data for Compound **2** was already provided by Mays *et. al.* in 1998 under the CCDC deposition code CCDC-100650.
- [18] F. Neese "The ORCA program system" Wiley Interdisciplinary Reviews: Computational Molecular Science, **2012**, Vol. 2, Issue 1, Pages 73–78.
- [19] a) A. D. Becke, *J. Chem. Phys.* **1993**, *98*, 5648-5652; b) C. Lee, W. Yang, R. G. Parr, *Phys. Rev. B* **1988**, *37*, 785-789; c) A. D. Becke, *Phys. Rev. A* **1988**, *38*, 3098-3100; d) S. H. Vosko, L. Wilk, M. Nusair, *Can. J. Phys.* **1980**, *58*, 1200-1211; e) J. C. Slater, *Phys. Rev.* **1951**, *81*, 385-390; f) P. A. M. Dirac, *Proc. Royal Soc. A* **1929**, *123*, 714-733.
- [20] a) A. Schäfer, C. Huber, R. Ahlrichs, *J. Chem. Phys.* **1994**, *100*, 5829; b) K. Eichkorn, F. Weigend, O. Treutler, R. Ahlrichs, *Theor. Chem. Acc.* **1997**, *97*, 119; c) F. Weigend, R. Ahlrichs, *Phys. Chem. Chem. Phys.* **2005**, *7*, 3297; d) F. Weigend, *Phys. Chem. Chem. Phys.* **2006**, *8*, 1057.
- [21] S. Grimme, S. Ehrlich, L. Goerigk, *J. Comput. Chem.* **2011**, *32*, 1456-1465.
- [22] V. Barone, M. Cossi, *M. J. Phys. Chem. A*, **1998**, *102*, 1995-2001.
- [23] O. V. Sizova, L. V. Skripnikov, A. Y. Sokolov, *J. Molec. Struct.: THEOCHEM* **2008**, *870*, 1-9.
- [24] T. Lu, F. Chen, *J. Comput. Chem.* **2012**, *33*, 580-592.
- [25] G. Knizia, *J. Chem. Theory Comput.* **2013**, *9*, 4834-4843.
- [26] IboView v20150427. <http://www.iboview.org/>
- [27] N. Reinfandt, C. Schoo, L. Dütsch, R. Köppe, S. Konchenko, M. Scheer, P. Roesky, *Chem. Eur. J.* **2021**, *27*, 3974-3978.
